# Supplementary material for: A Self-Breathing Electrode Enabled by Interface Regulation and Gradient Wettability Engineering for Industrial H2O2 Electrosynthesis
Source: Research Square preprint supplement (doi:10.21203/rs.3.rs-7096765/v1), 2025-07-21
Supplement: Supplementary file 1 [file 11993691327cf29ad52e0a1a.docx]

**Supplementary Information**

**A Self-Breathing Electrode Enabled by Interface Regulation and Gradient Wettability Engineering for Industrial H2O2 Electrosynthesis**

Ye Tian 1, Luowei Pei 1, Shuo Wang 1, Kongrui Yu 1, Yuqing Xu 1, Xiaoqin Ye 4, Songming Zhu 1,3, Ying Liu 1,3, Zhenghua Zhang 2*, and Zhangying Ye 1,3*

1 College of Biosystems Engineering and Food Science, Zhejiang University, Hangzhou, 310058, China

2 Membrane & Nanotechnology-Enabled Water Treatment Center, Guangdong Provincial Engineering Research Centre for Urban Water Recycling and Environmental Safety, Institute of Environment and Ecology, Tsinghua Shenzhen International Graduate School, Tsinghua University, Shenzhen 518055, China

3 Key Laboratory of Equipment and Informatization in Environment Controlled Agriculture, Ministry of Agriculture and Rural Affairs, Hangzhou 310058, China

4 Zhejiang Epai Technology Co., Ltd, Hangzhou 310000, China

*Corresponding author: [zhenghua.zhang@sz.tsinghua.edu.cn](mailto:zhenghua.zhang@sz.tsinghua.edu.cn) (Zhenghua Zhang); [yzyzju@zju.edu.cn](mailto:yzyzju@zju.edu.cn) (Zhangying Ye).

1. **Supplementary Texts**

**Text 1**

In our initial attempt to reconstruct the 3D structure of the CL, we obtained the 3D structure shown in **Fig. S10**. CB and PTFE displayed a large number of "stalactite structures," with a consistent elongation direction. This phenomenon was previously observed and reported by Takeshi Terao et al1. However, such structures were not present in SEM images taken at any angle of the 2D projections, and in the absence of a method to control the growth direction during electrode preparation, such regular structures should not appear. Therefore, we concluded that the 3D structural information obtained was erroneous.

The principle of 3D reconstruction involves first extracting pixel information from different planes, then filling in pixel blocks between each plane, and finally converting the 2D images into a 3D structure. Upon analyzing each 2D image from the FIB cuts, we discovered that during the grayscale segmentation of each 2D image, the algorithm struggled to distinguish the grayscale values of spherical particles at different depths, as the height of the spherical particles was very similar. This led to the erroneous extraction of solid structure information from other planes, causing all solid structures to be stretched along the depth direction, ultimately resulting in "stalactite " formations.

As shown in **Fig. S11**, the CB particles outlined by the black box appear consistently from the fifth image to the fiftieth image. This suggests that the particle should be located deeper, beyond the fifth image, but due to the lack of any covering from above, the imaging system captured the information in the fifth image. Crucially, during the 3D reconstruction, the algorithm mistakenly identified the particle as already existing in the plane of the fifth image, causing the segmentation algorithm to extend it from the fifth image to the fiftieth. Since the resolution along the depth direction is 5 nm (determined by the FIB cutting width), the system fills the depth between images 5 to 50 with pixel data, resulting in an artificial extension of the particle by 225 nm in the final 3D reconstruction. This phenomenon occurred because the particle was not actually cut at this depth, and the diameter remained the same across all images. As a result, the reconstructed 3D image displayed a "stalactite" morphology.

More importantly, we found that even advanced deep learning techniques could not resolve this issue. Deep learning methods require large, pre-labeled datasets, but manually labeling the data to accurately determine which solid structures belong to which planes is highly challenging. Thus, it is difficult to provide the model with precise data for training.

To address this, we adopted a sample preparation method inspired by biological cell structure reconstruction. We immersed the sample in epoxy resin and placed it in a vacuum chamber for impregnation. Due to the complete wettability of the resin, it gradually filled all the pores within the CL. Once the resin solidified, we performed FIB cutting and captured images layer by layer. With this method, each 2D image only contained grayscale information for the resin and solid structures, making it easier to distinguish between the two using grayscale segmentation. The areas corresponding to the resin represented the pore structures originally present in the CL.

This approach accurately reproduced the 3D structure of the CL and is significantly simpler than current deep learning-based image recognition techniques (which require large amounts of manual labeling and training). It offers a more straightforward and effective solution and could serve as a reference for other studies.

**Text 2**

**Investment and Production Costs for Electrosynthesizing Pure H2O2**

The main sources of investment and production costs for electrosynthesized H2O2 are the cost of the stack and its components, as well as energy consumption during the operation process. These costs are summarized in **Table S7**.

(1) Cost of Integrated Stack

The primary costs for the integrated stack arise from the materials used to assemble the stack, such as structural materials, bipolar plates, membranes (both anion and cation membranes), anodes, and gas diffusion electrodes (GDEs). These fall under the fixed investment for the integrated equipment (the cost is calculated based on a stack capable of installing electrodes with a size of 25 cm2). The cost calculation is as follows:

(41.5 + 27.67) $/cell × 1 + (0.076 + 0.08) $/cm2 × 25 cm2 + 0.0715 $/g × 10 g=73.79 $

(2) Production Cost of Pure H₂O₂ in Integrated Stack

The production cost of electrosynthesized H₂O₂ in the integrated stack is mainly driven by the energy and oxygen consumption during the process. The actual operating parameters for the stack are: 4.5V, 5A, with a production rate of 0.1 g/cm²/h (2.5 g/h). The oxygen generator's converted power is 32.5 W.

The hourly electricity consumption cost is calculated as:

(4.5 V×5 A+32.5 W) × 0.05 $/KWh = 0.00275 $/h

With a 25 cm² electrode area, the stack produces 2.5 g/h of H₂O₂, resulting in a production cost of 1.1 $/kg.

**Investment and Production Costs for Electrosynthesizing Alkaline H2O2**

The main sources of investment and production costs for electrosynthesized alkaline H2O2 are the cost of the stack and its components, as well as energy consumption during the operation process. These costs are summarized in **Table S8**.

(1) Production Cost of alkaline H2O2 in Integrated Stack

The production cost of electrosynthesized H2O2 in the integrated stack is mainly driven by the energy and oxygen consumption during the process. The actual operating parameters for the stack are: 9.5 V, 10 A, with a production rate of 24 g/h.

The hourly electricity and NaOH consumption cost is calculated as:

9.5 V×10 A× 0.05 $/KWh+0.0044 $/h = 0.00915 $/h

With a 100 cm² electrode area, the stack produces 24 g/h of H₂O₂, resulting in a production cost of 0.381 $/kg.

1. **Supplementary Figures**


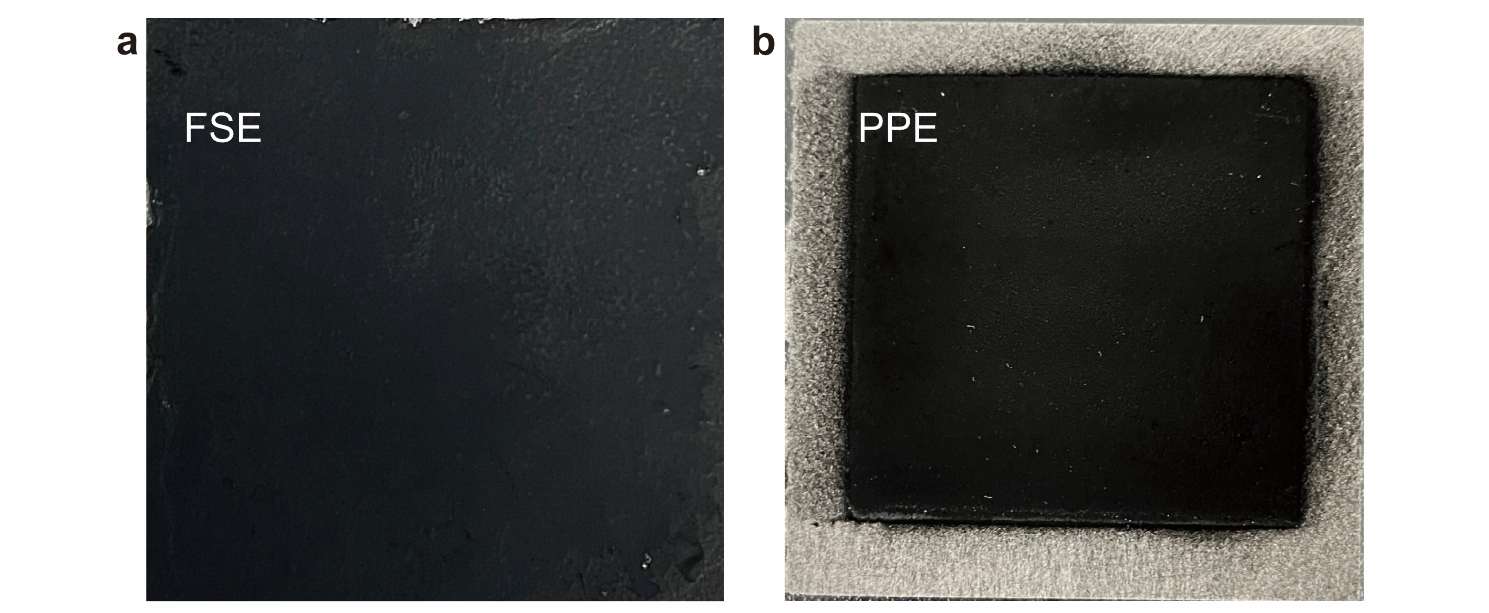


**Supplementary Fig 1. Morphology of two GDEs. a** conventional fused–segregated interface (FSE) and **b** non-fused particulate-packed interface (PPE) electrodes.


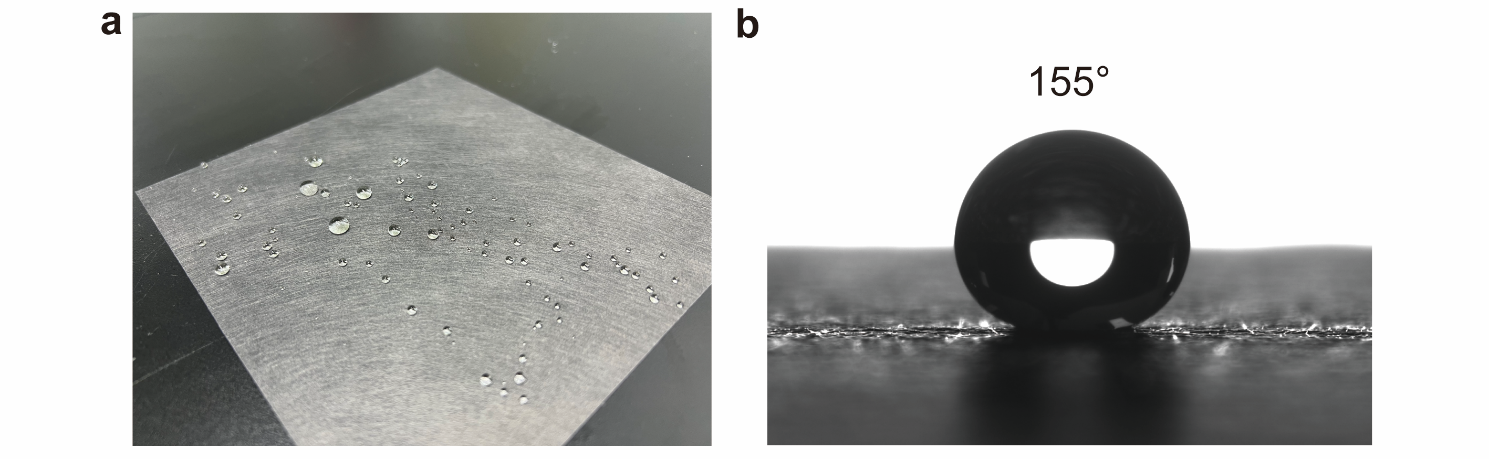


**Supplementary Fig 2.** **Hydrophobicity of Carbon paper (CP). a** CP**. b** CA of CP.


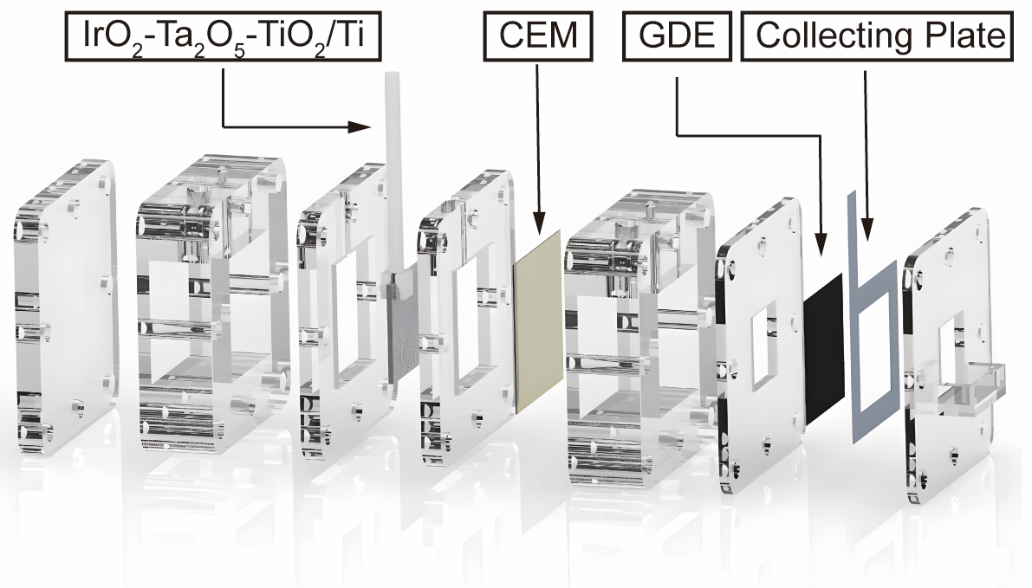


**Supplementary Fig 3.** **Experimental setup for *in*-*situ* electrochemical production of H2O2.**


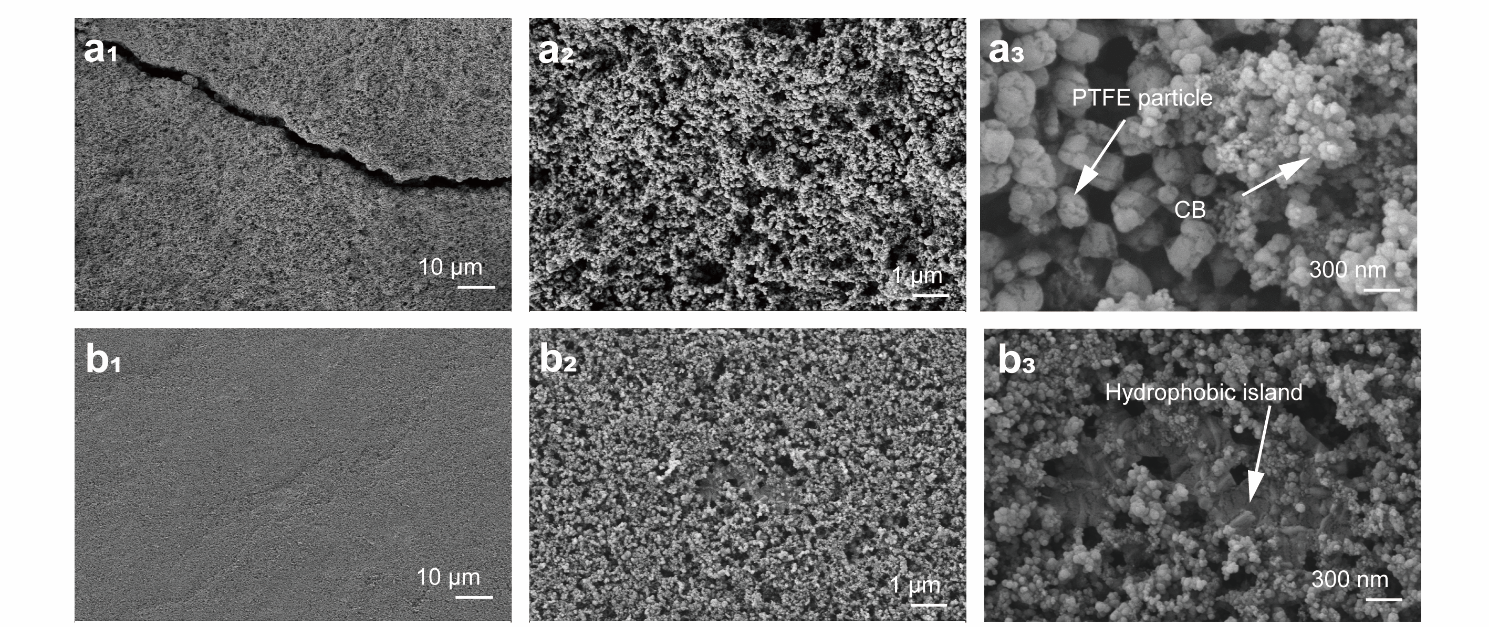


**Supplementary Fig 4.** **Morphological comparisons of two catalyst/binder interface structures.** SEM images of non-fused particulate-packed interface (PPE) (**a1**-**a3**) and conventional fused–segregated interface (FSE) (**b1**-**b3**).

The CL of the FSE electrode consists of randomly distributed CB and fused, aggregated PTFE, appearing as a highly compact structure under low magnification. In contrast, the PPE electrode exhibits a porous and uniform network, where PTFE exists as discrete particles interspersed with CB, forming an open, loosely packed architecture.


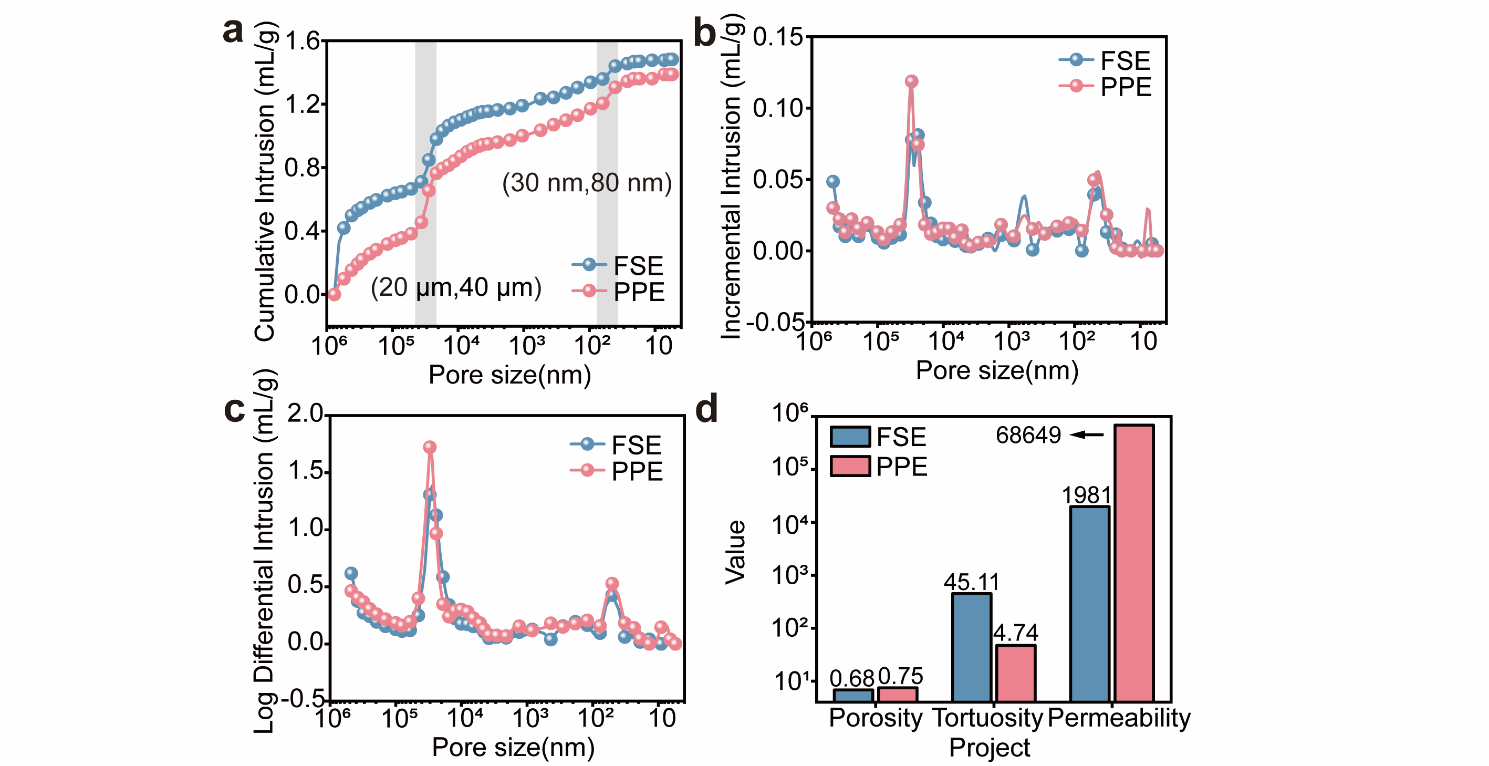


**Supplementary Fig 5.** **Mercury intrusion porosimetry analysis of conventional fused–segregated interface (FSE) and non-fused particulate-packed interface (PPE) electrodes.** **a** Cumulative intrusion volume curves; **b** Incremental intrusion volume curves; **c** Log-differential pore volume distribution; **d** Comparison of porosity, tortuosity, and permeability. The pore distribution profiles (Fig. S5a–c) show that both macropores (20–50 μm) and mesopores (30–80 nm) were more abundant in PPE, resulting in higher total pore volume. Additionally, FSE exhibited lower porosity and permeability, but significantly higher tortuosity (Fig. S5d), indicating a more convoluted mass transport path across the CL.


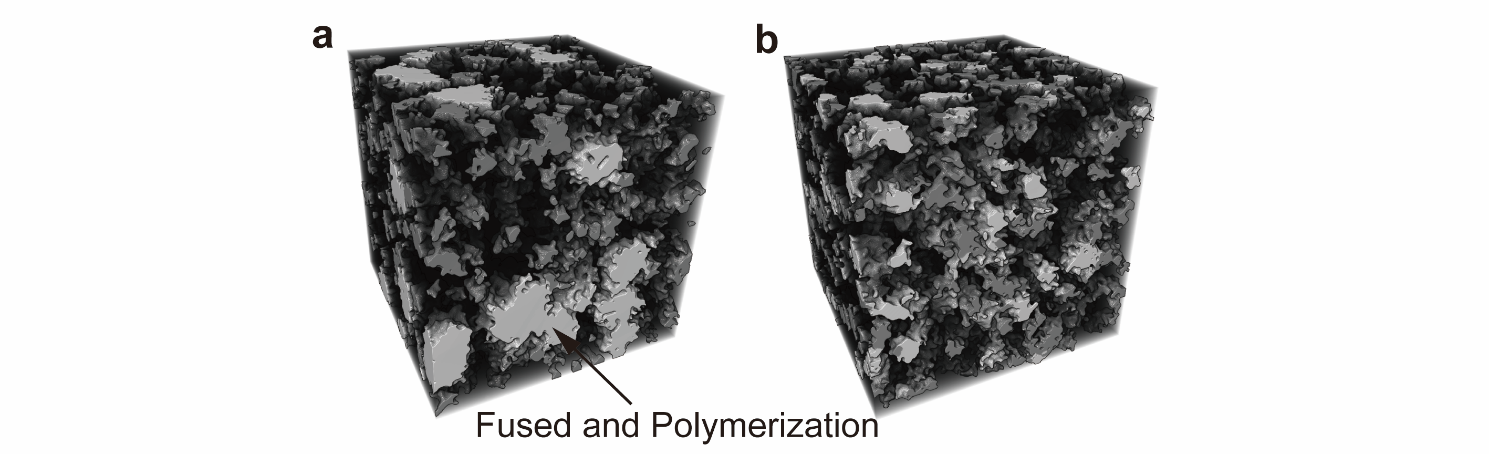


**Supplementary Fig 6.** **3D structure reconstructed by Quartet Structure Generation Set (QSGS).** CL structure of **a** conventional fused–segregated interface (FSE) and **b** non-fused particulate-packed interface (PPE)


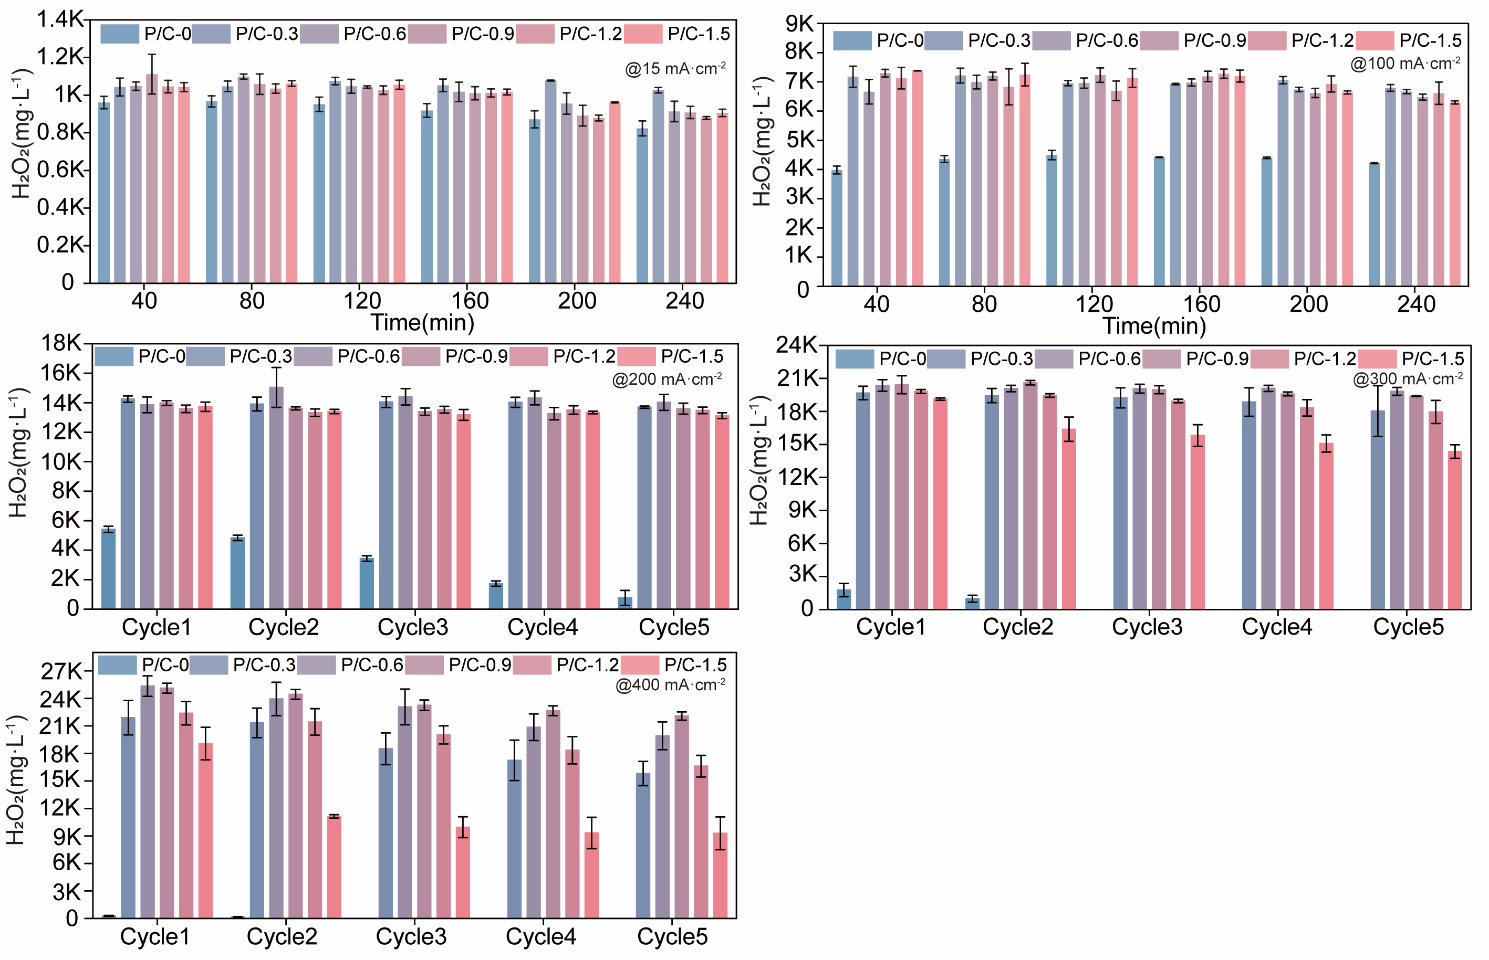


**Supplementary Fig 7.** **H2O2 yeild for non-fused particulate-packed interface (PPE) electrodes at 15, 100, 200, 300, 400 mA/cm²**


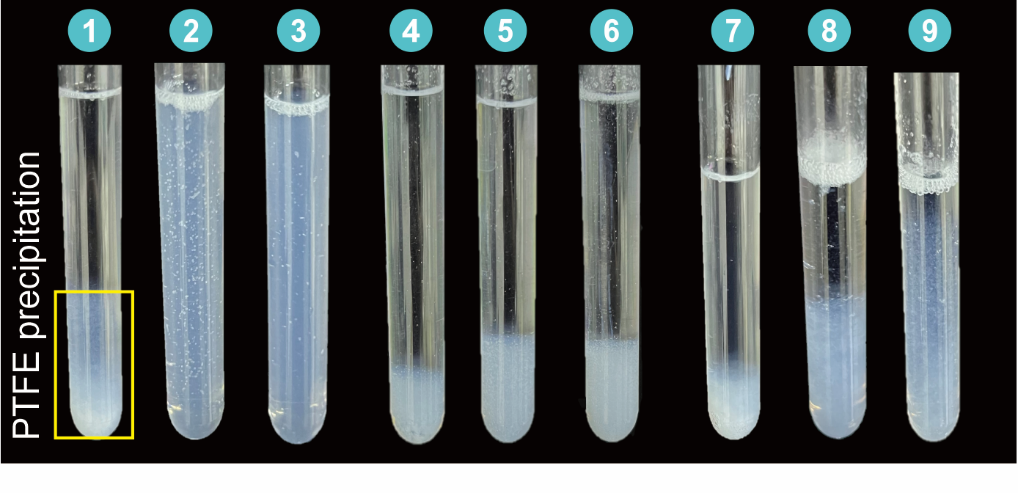


**Supplementary Fig 8.** **PTFE-containing mixed solutions under different mixing conditions.**

Nine PTFE-containing mixed solutions were prepared using various sequences, solvent compositions, and ultrasonication conditions. Each formulation consisted of 4 mL (or 2 mL) deionized water, 5 mL isopropanol, and 0.15 mL of 5 wt% PTFE emulsion. The mixtures were ultrasonicated at either 10 °C or 40 °C. Specific preparation procedures were as follows:

1：PTFE emulsion was directly added to isopropanol, followed by water. Ultrasonication was performed at 10 °C.

2：PTFE emulsion was first diluted with water, then added all at once to isopropanol. Ultrasonication was performed at 10 °C.

3：PTFE emulsion was first diluted with water, then slowly added dropwise into isopropanol. Ultrasonication was performed at 10 °C.

4：PTFE emulsion was directly added to isopropanol, followed by water. Ultrasonication was performed at 40 °C.

5：PTFE emulsion was first diluted with water, then added all at once to isopropanol. Ultrasonication was performed at 40 °C.

6：PTFE emulsion was first diluted with water, then slowly added dropwise into isopropanol. Ultrasonication was performed at 40 °C.

7：Using 2 mL water instead of 4 mL, PTFE emulsion was directly added to isopropanol, followed by water. Ultrasonication was performed at 40 °C.

8：Using 2 mL water, PTFE emulsion was first diluted with water, then added all at once to isopropanol. Ultrasonication was performed at 40 °C.

9：Using 2 mL water, PTFE emulsion was first diluted with water, then slowly added dropwise into isopropanol. Ultrasonication was performed at 40 °C.

It was observed that high-concentration PTFE emulsions tend to form large precipitates when introduced directly into alcohol-based solvents, and such aggregates could not be readily redispersed, even after dilution with deionized water and prolonged ultrasonication. In contrast, lowering the PTFE concentration and gradually mixing it with the alcohol phase significantly improved dispersion uniformity. Additionally, the rising temperature during ultrasonication may cause irreversible PTFE aggregation. Therefore, future work should explore advanced dispersion strategies, such as bead milling or high-shear mixing under temperature-controlled conditions, to further reduce particle size and enhance stability during ink preparation.


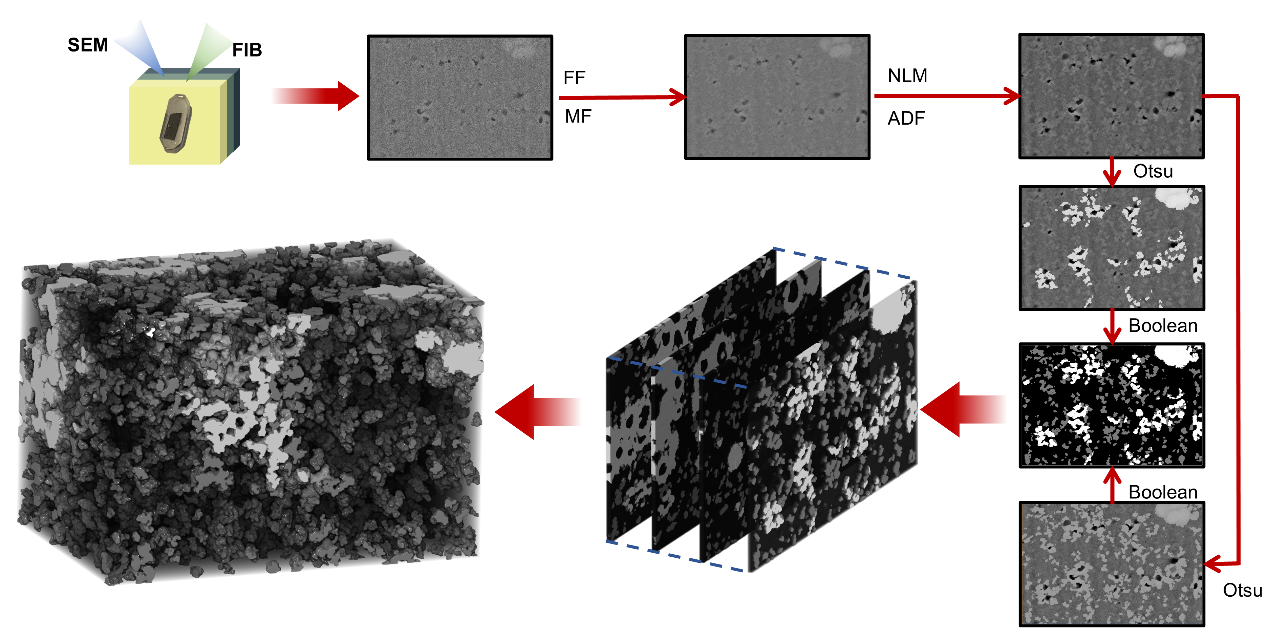


**Supplementary Fig 9. 3D reconstruction workflow diagram by SEM-FIB.**

Specifically, the GDE samples were first impregnated with resin under vacuum to ensure complete infiltration of the catalyst layer (CL) pores. A focused ion beam (FIB) was then used to sequentially mill the CL at 5 nm intervals, and after each milling step, the exposed cross-section was imaged using a scanning electron microscope (SEM). The resulting image stack was preprocessed by applying fast Fourier transform and mean filtering to remove vertical stripe artifacts. Non-local means and anisotropic diffusion algorithms were subsequently employed to reduce noise and enhance contrast. Carbon black (CB) and PTFE phases were segmented using the maximum inter-class variance method (Otsu’s thresholding) combined with Boolean operations. Finally, voxel interpolation between slices was performed to reconstruct the full three-dimensional structure of the CL.


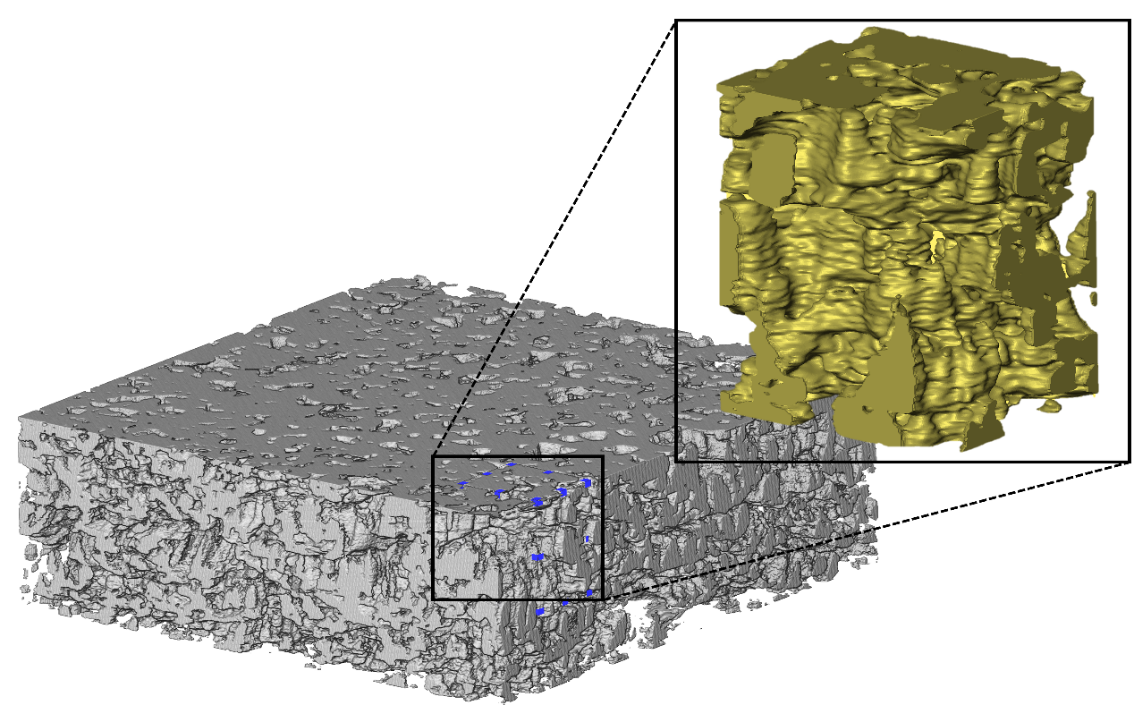


**Supplementary Fig 10. Three-dimensional structure of the CL.**


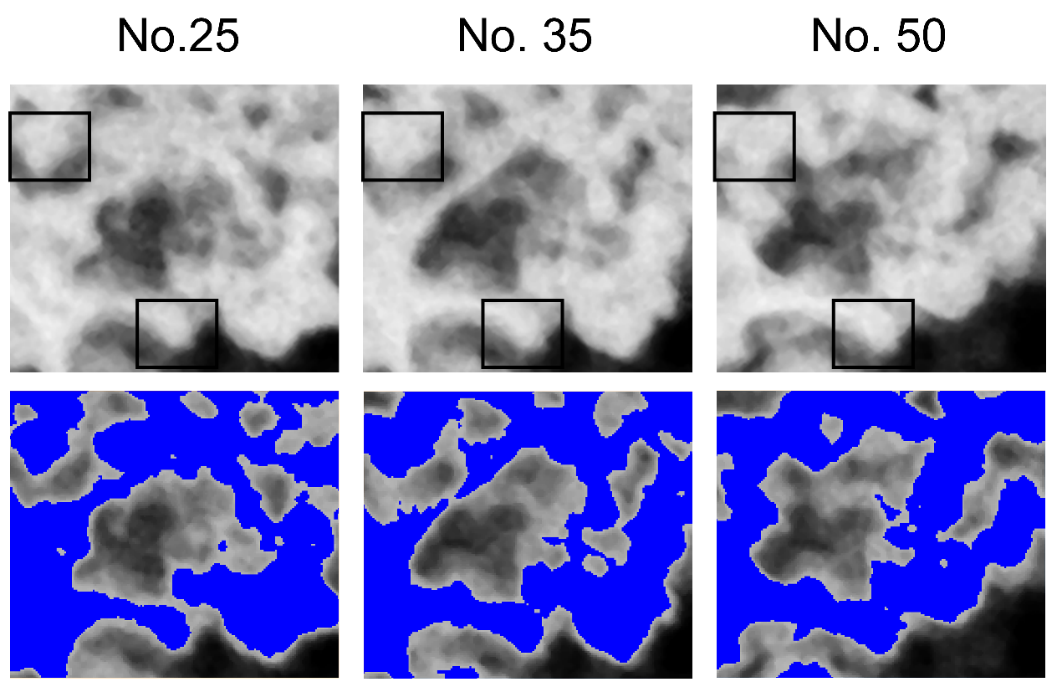


**Supplementary Fig 11.** Local magnified SEM image of the CL and segmentation using the Otsu’s thresholding method. The structure within the black box continues to appear up to the fiftieth image, leading the algorithm to identify it as a long physical structure. However, in reality, it does not belong to that particular plane.


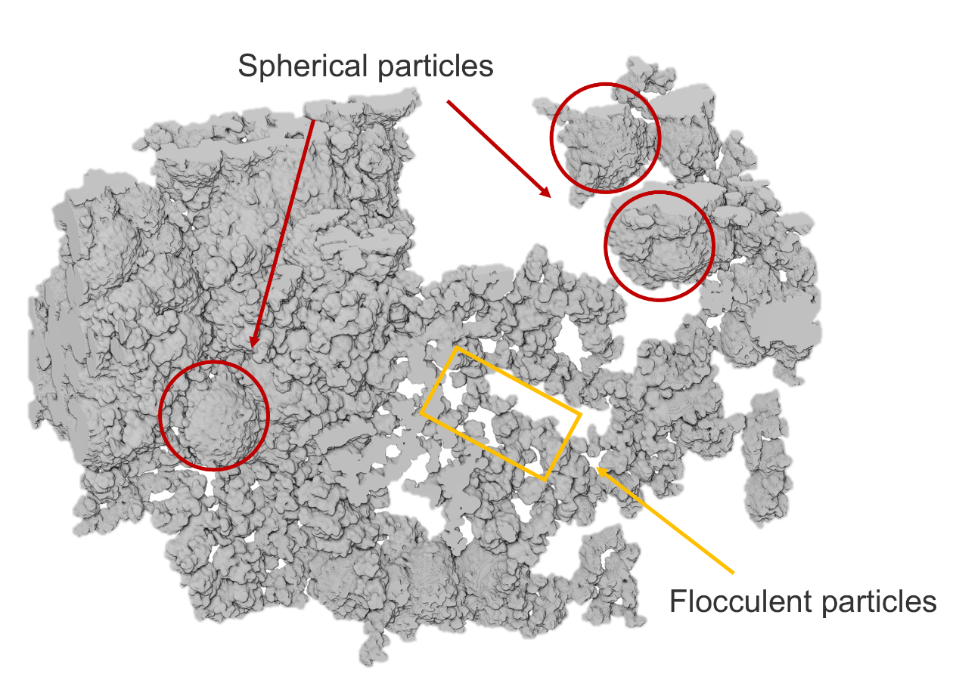


**Supplementary Fig 12.** **The true three-dimensional structure of PTFE.**


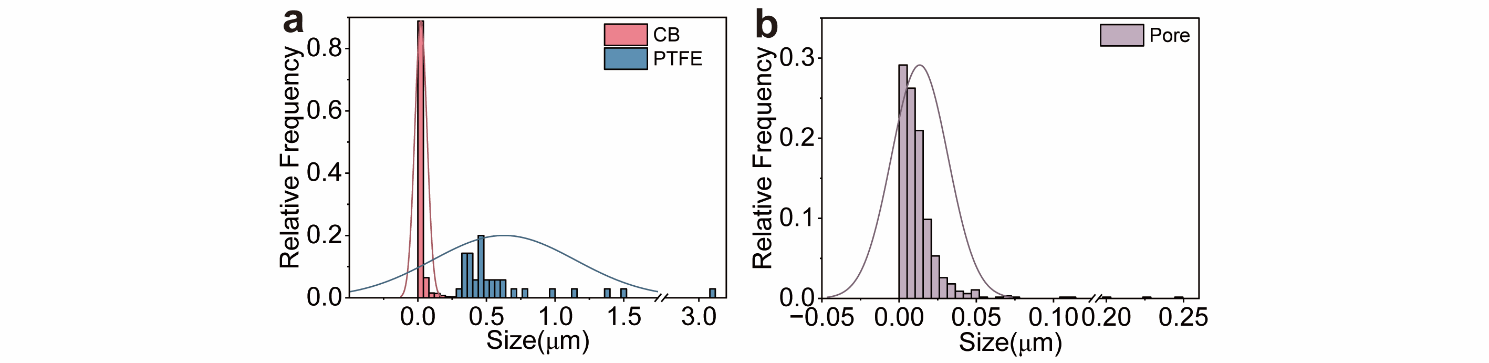


**Supplementary Fig 13. Quantitative statistics of CL structure information.** Diameter distributions of **a** CB, PTFE, and **b** pores in the CL, derived from 3D reconstruction data.





**Supplementary Fig 14. Volume fractions of CB, PTFE, and pores.**


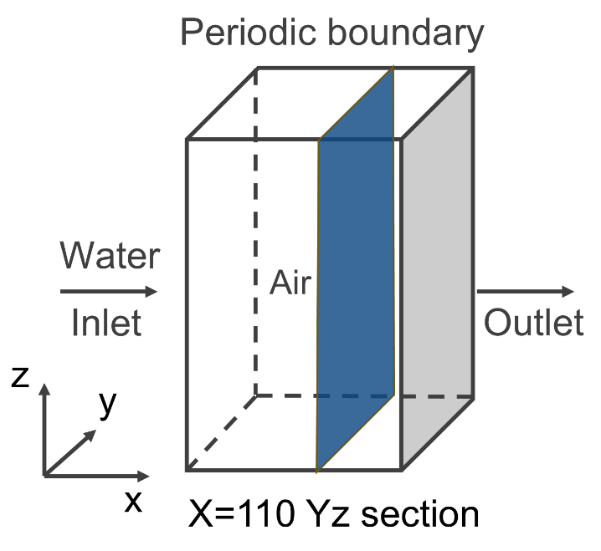


**Supplementary Fig 15. Boundary condition schematic for LBM, with a computational domain of 2 × 2 × 3 μm.**


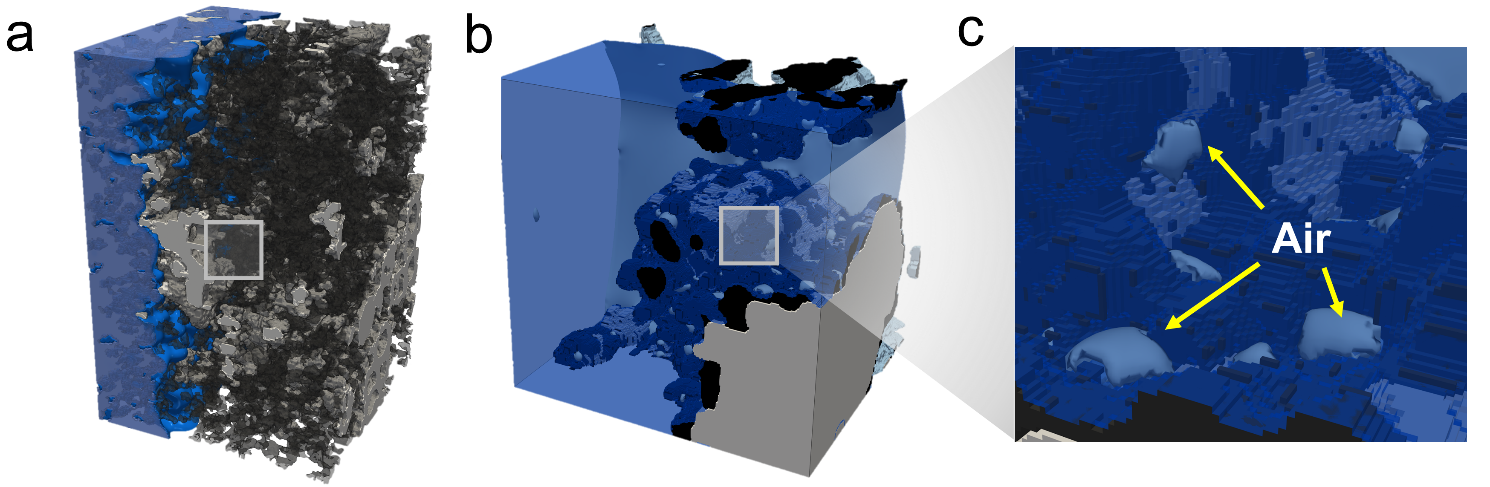


**Supplementary Fig 16. Gas–liquid–solid distributions in reconstructed CL structures from LBM simulations.** **a** Tris-phase configuration within the catalyst layer at a representative lattice timestep, obtained via LBM simulation. CB and PTFE are rendered in black and white, respectively; liquid electrolyte and air are visualized in dark and light blue. **b** Enlarged view of spherical PTFE-CB agglomerates within a 400 × 400 × 400 nm³ domain, showing localized gas entrapment at heterogeneous wettability interfaces. **c** Snapshot of gas–liquid coexistence regions in a mixed-interface structure, highlighting spatially distributed triple-phase zones formed by particulate packing.


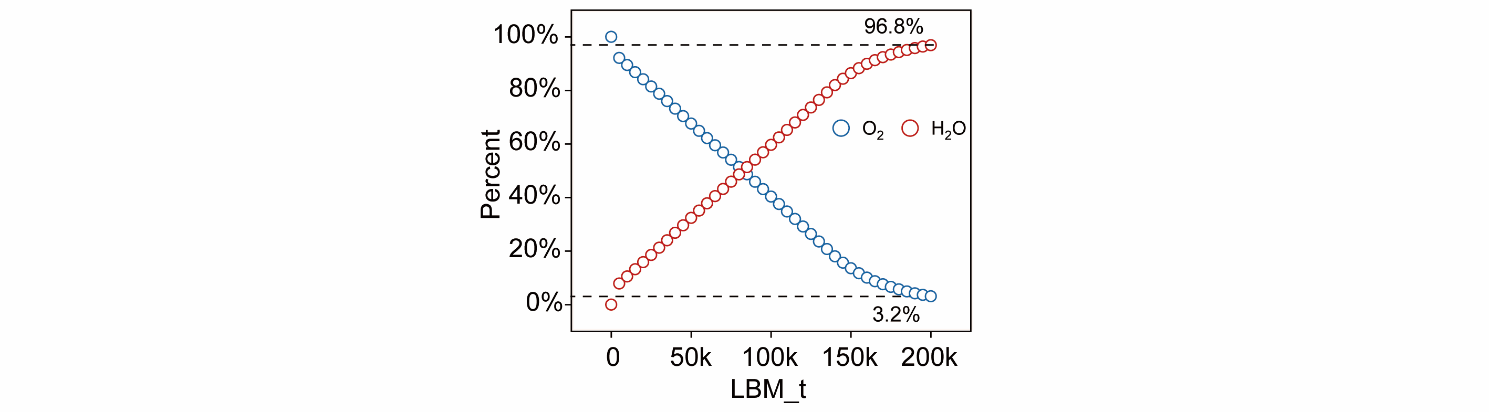


**Supplementary Fig 17. Gas-liquid saturation in the CL at different time intervals.**


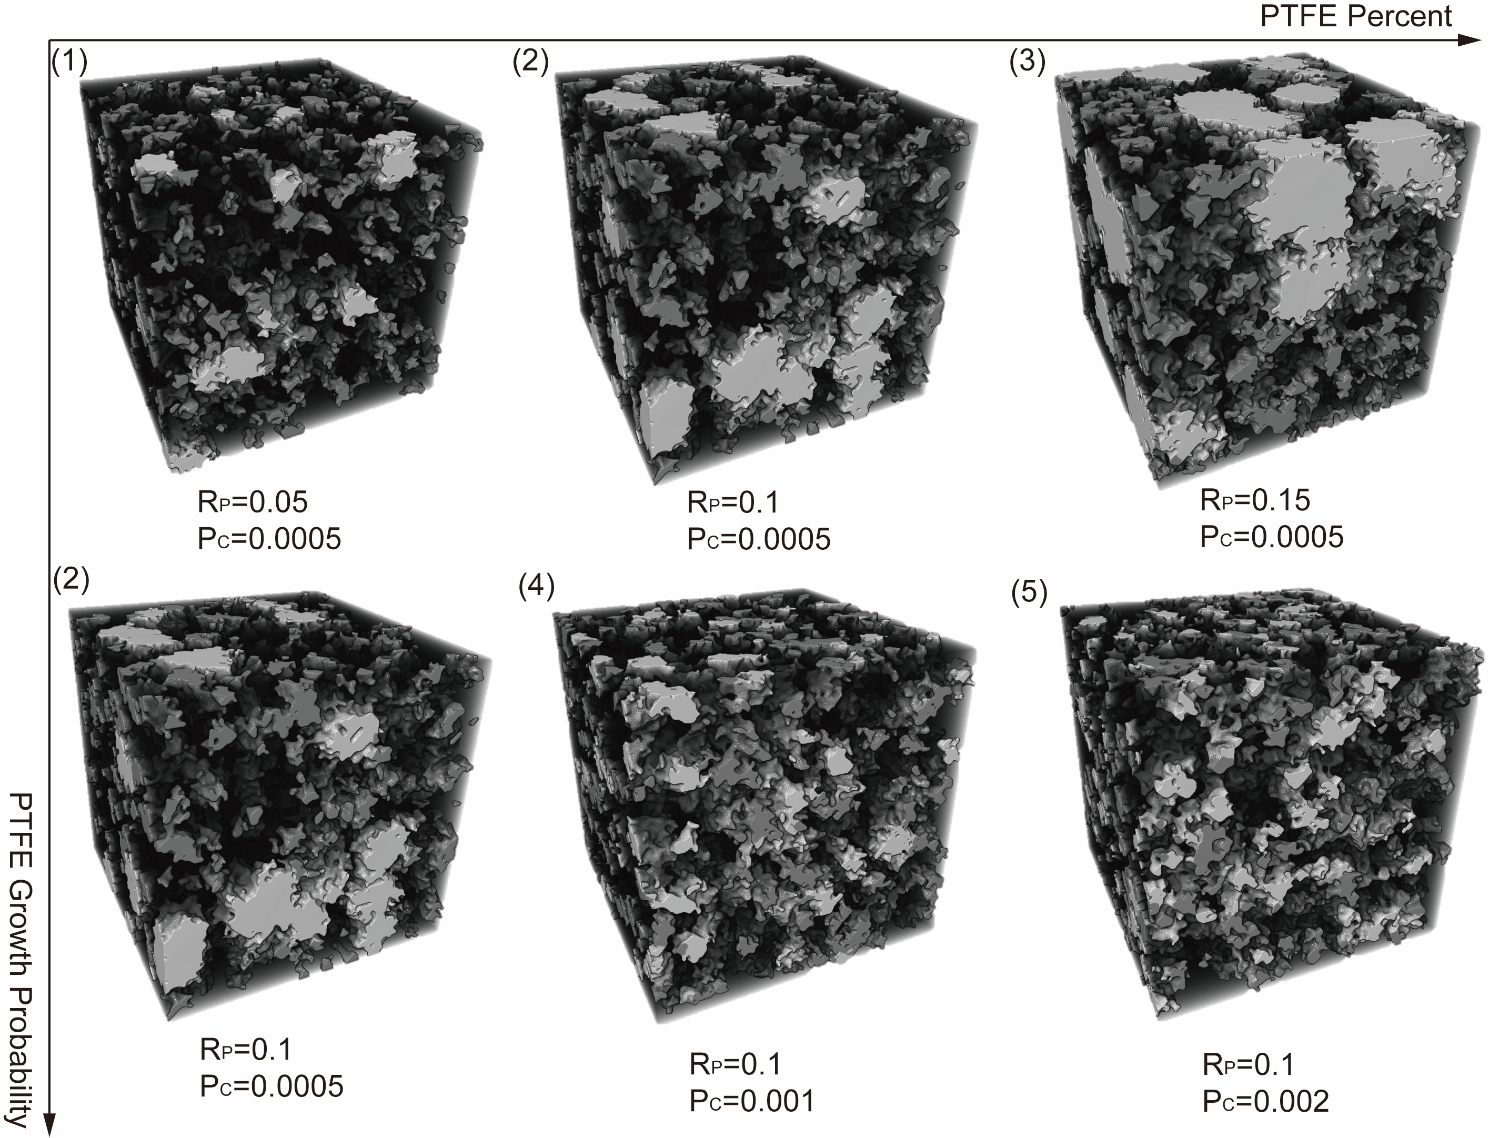


**Supplementary Fig 18. Quartet Structure Generation Set (QSGS)-reconstructed CL structures with varying PTFE contents and spatial distributions.** Five representative CL morphologies reconstructed via the QSGS method to simulate the influence of PTFE content and dispersion quality. Structures **(1)**, **(2)**, and **(3)** share the same PTFE nucleation probability (*P*c) but exhibit increasing PTFE volume fractions (*R*p), mimicking CLs fabricated from inks with identical mixing conditions but varying PTFE loadings. Structures **(2)**, **(4)**, and **(5)** maintain a constant *R*p while increasing *P*c, corresponding to identical ink compositions processed under different dispersion conditions. Enhanced nucleation probability leads to more uniform PTFE/CB mixing and fewer aggregated PTFE domains.


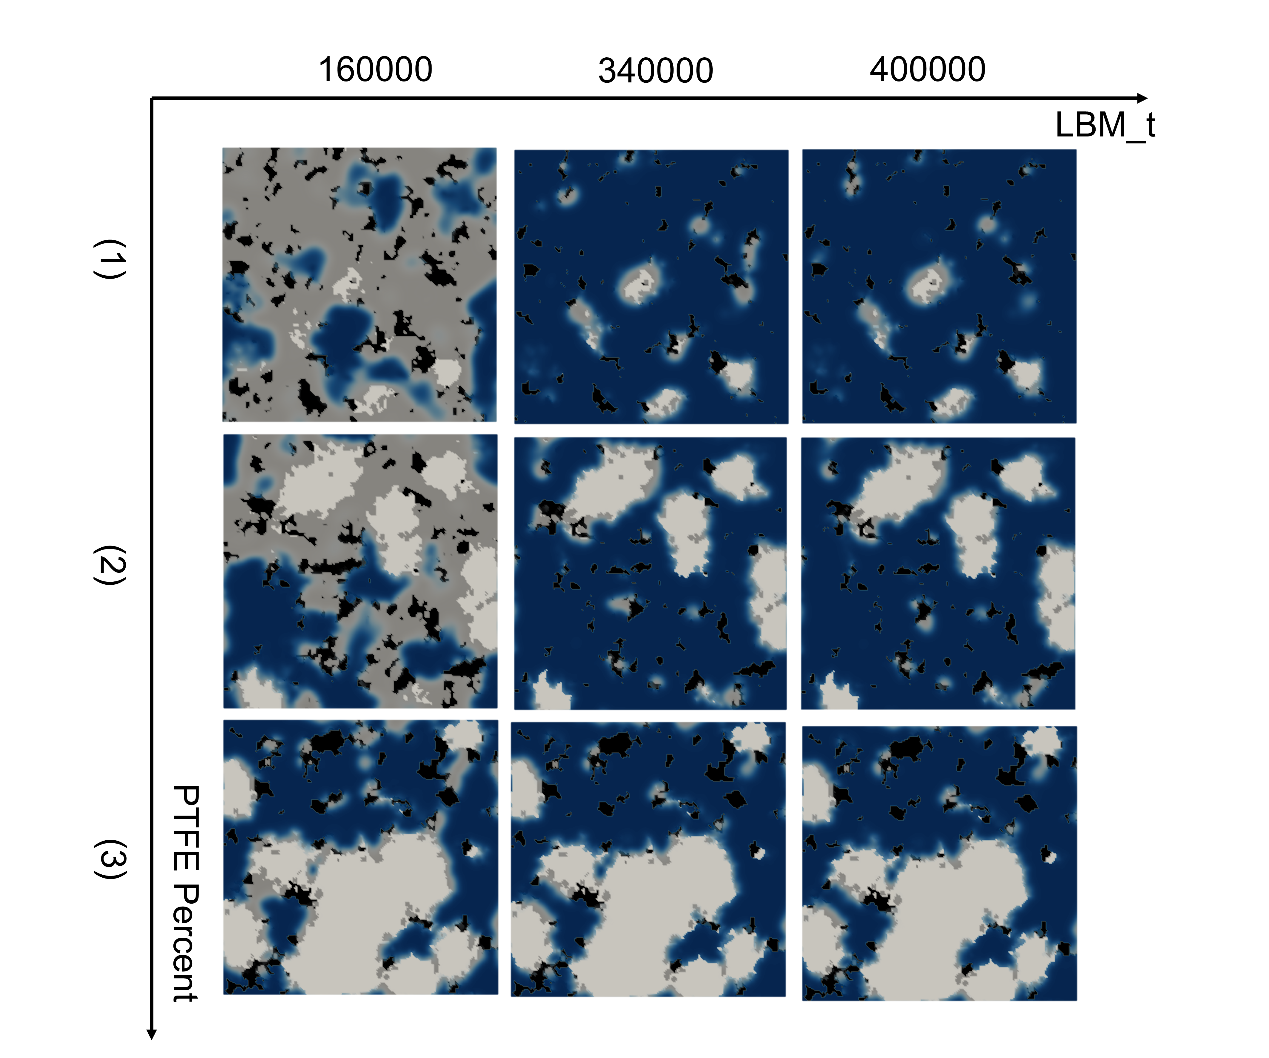


**Supplementary Fig 19. Gas-liquid distribution of Structures (1), (2), and (3) at different lattice time steps.** Although Structure **(3)** has the lowest liquid saturation, it is evident that regions other than the PTFE areas are more prone to water flooding. Therefore, unless the uniformity of PTFE is effectively addressed, further increasing PTFE content may not yield additional benefits in constructing the three-phase interface and could even have negative effects.


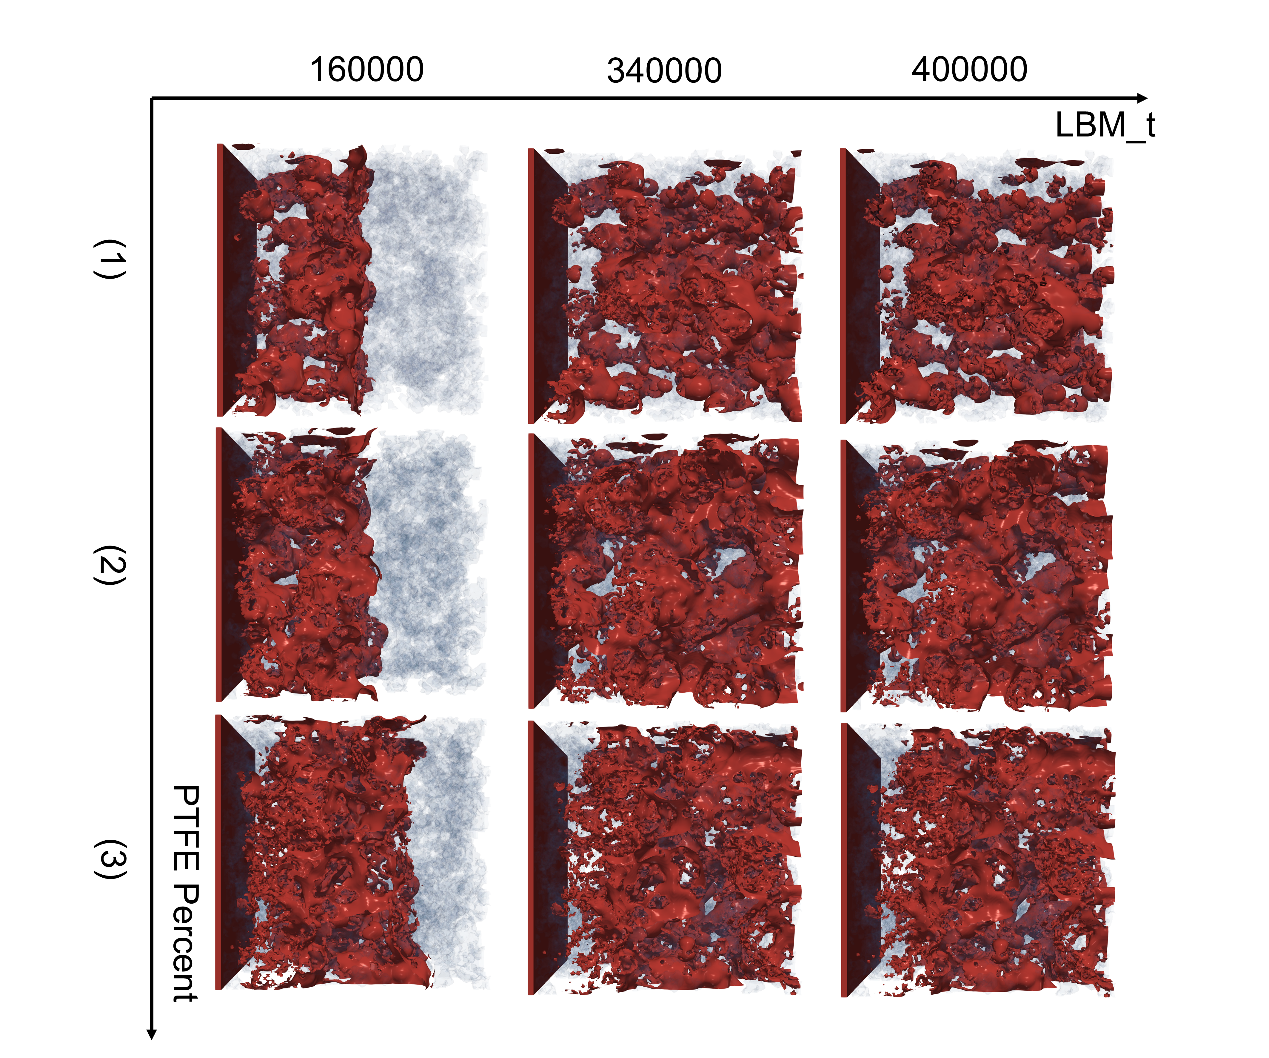


**Supplementary Fig 20. Gas-liquid interface distribution of Structures (1), (2), and (3) at different lattice time steps.** Structure **(1)** Due to the lower PTFE content, the number of gas-liquid interfaces formed is fewer compared to structure **(2)** and **(3)**. However, increasing the PTFE content can only enhance the number of gas-liquid interfaces to a certain extent, as no significant difference is observed between structure **(2)** and **(3)**.


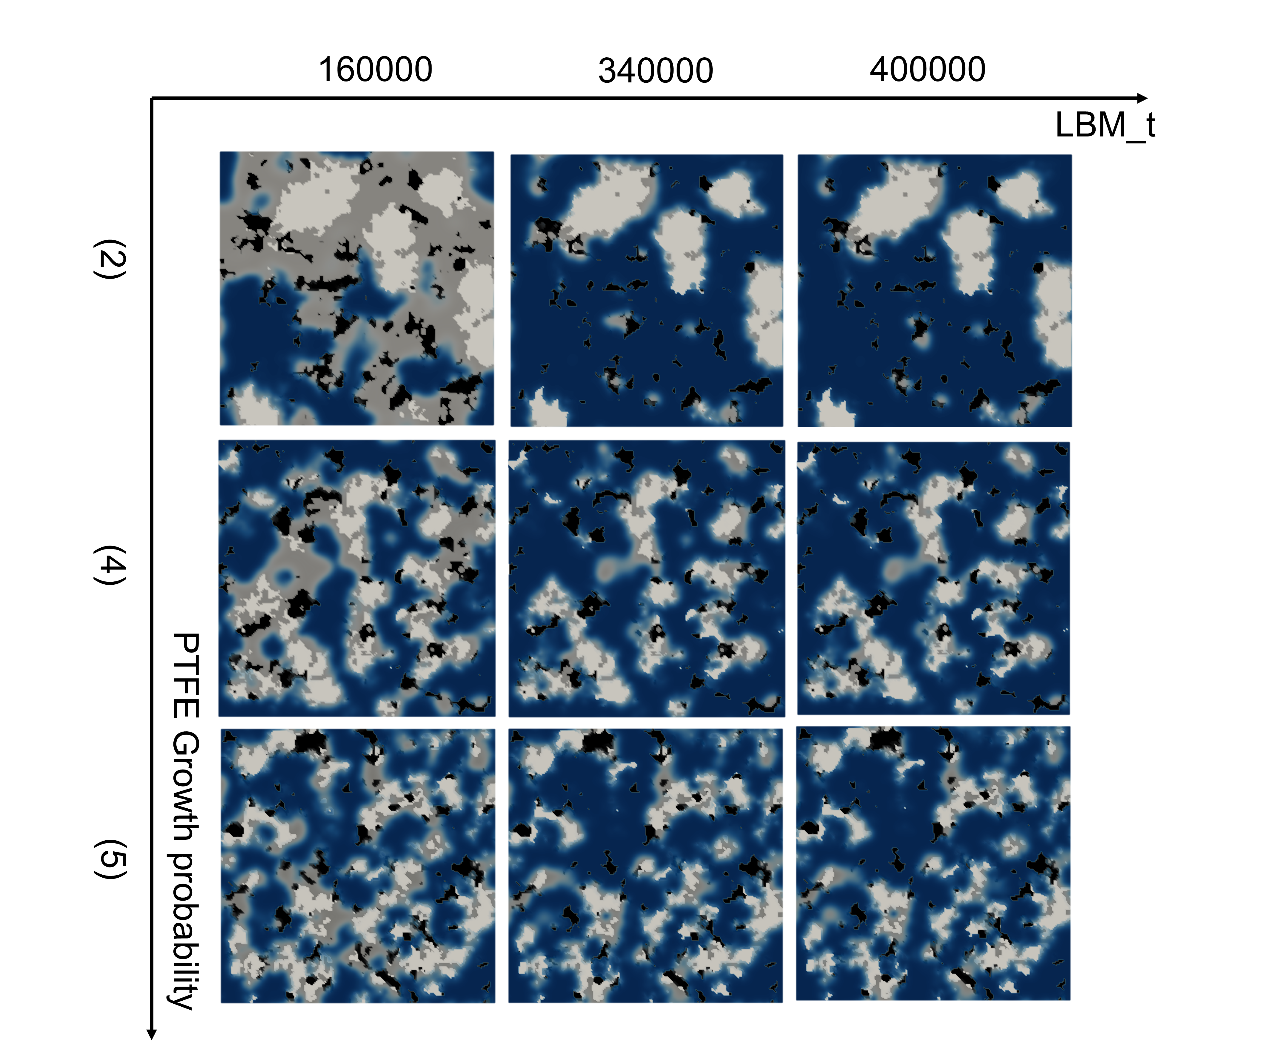


**Supplementary Fig 21.** **Gas-liquid distribution of Structures (2), (4), and (5) at different lattice time steps.** The improved uniformity of PTFE leads to a more dispersed liquid distribution, with a noticeable increase in gas-liquid-solid interfaces. This significantly enhances the formation of three-phase interfaces within the CL.


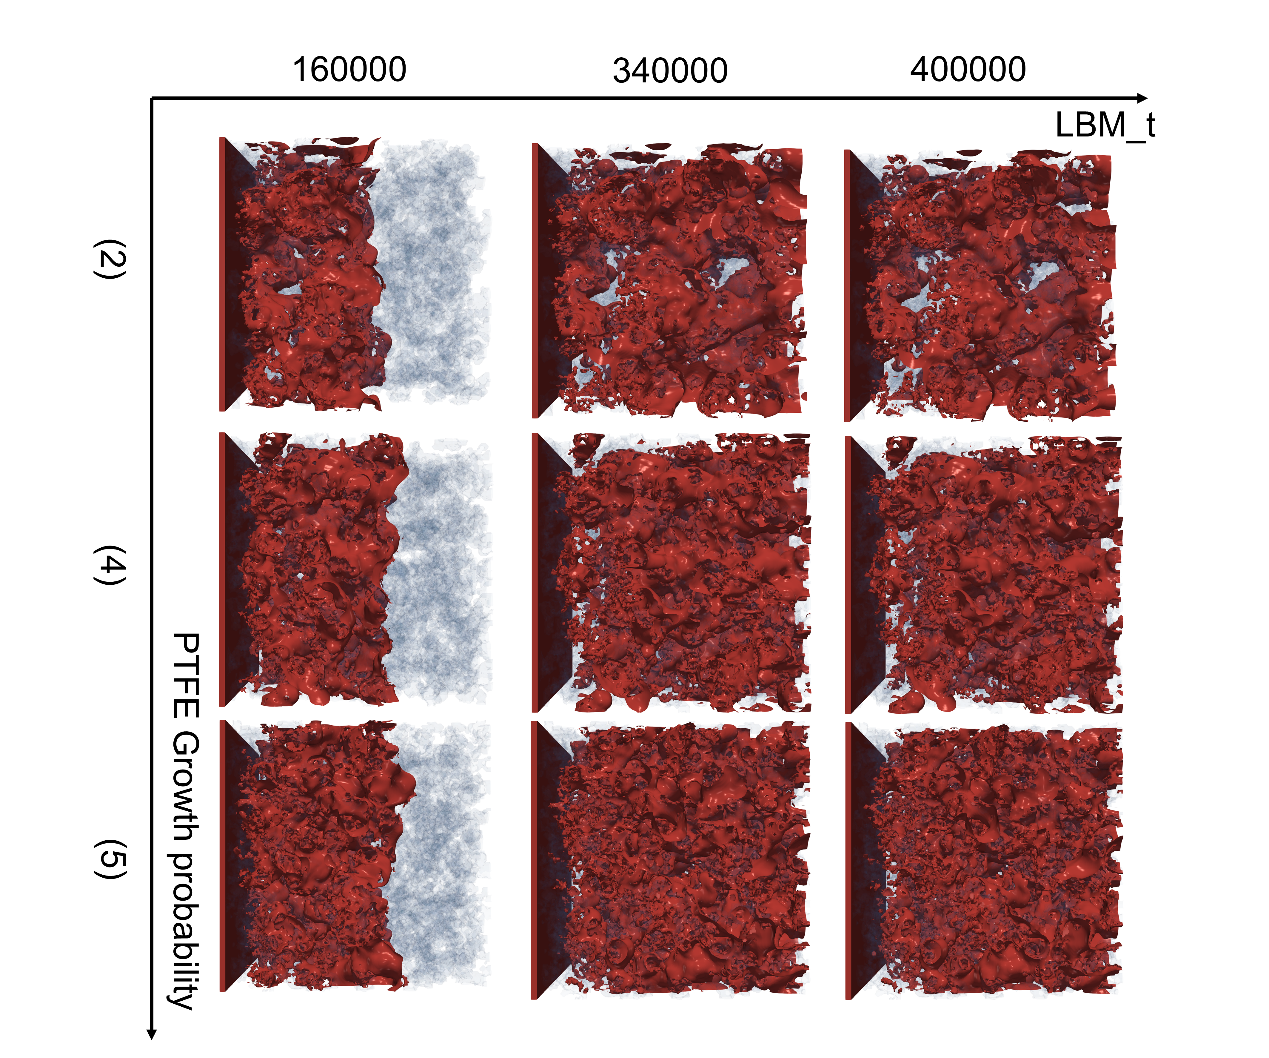


**Supplementary Fig 22. Gas-liquid interface distribution of Structures (2), (4), and (5) at different lattice time steps.** In the CL structure with aggregated PTFE, gas tends to exist in the form of large bubbles, which may result in regions dominated by either water or gas, creating a two-phase environment. As the uniformity of PTFE/CB improves, the gas bubble diameter decreases, and the distribution becomes denser, thereby increasing the number of three-phase interfaces.


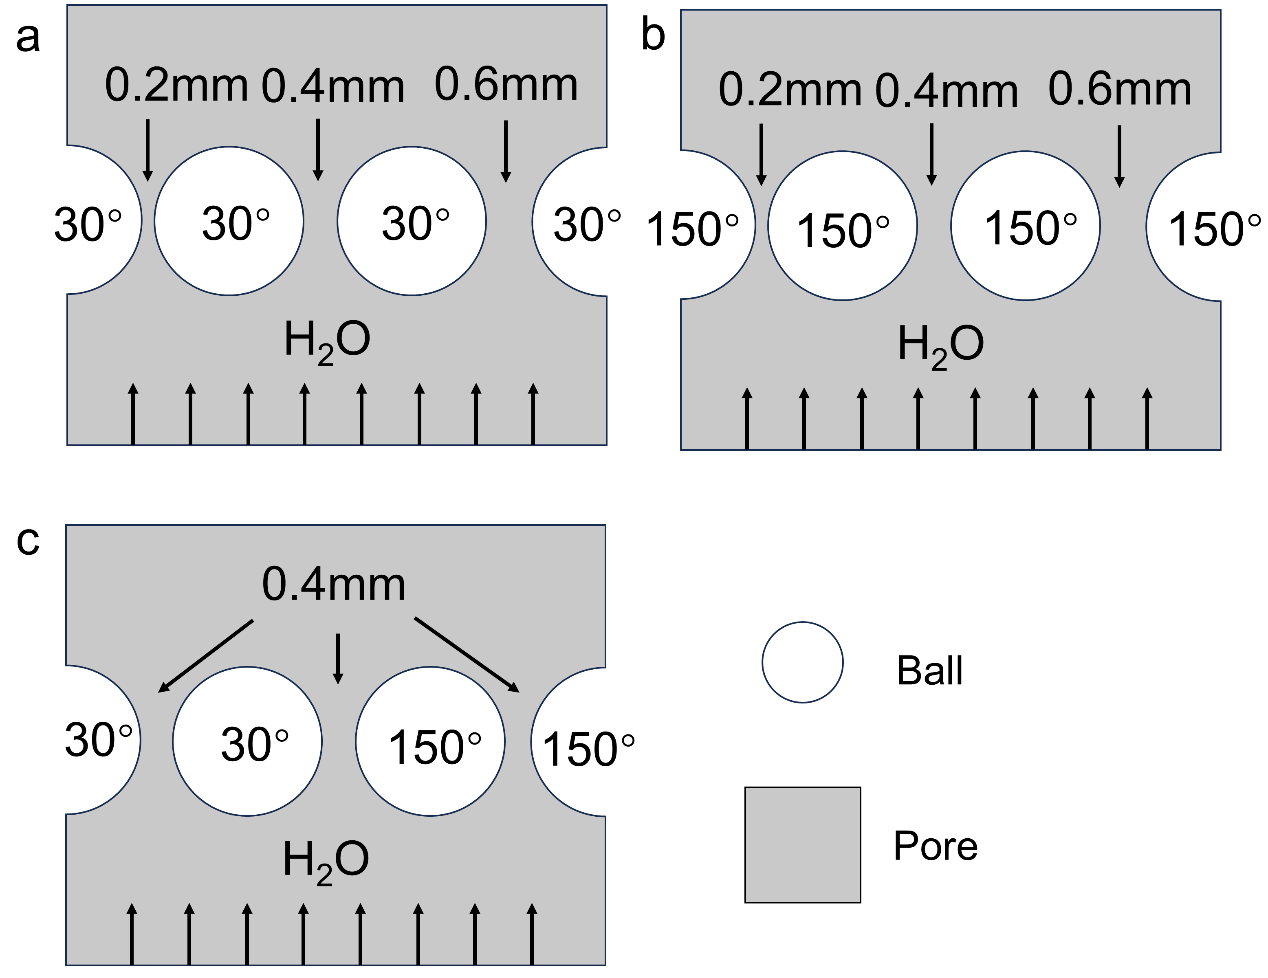


**Supplementary Fig 23. Physical models and boundary conditions.** **a** hydrophilic pore of varying sizes. **b** hydrophobic pores of varying sizes, and **c** alternating hydrophilic and hydrophobic pores of the same size. These models highlight the combined influence of pore structure and surface wettability on gas-liquid flow behavior.


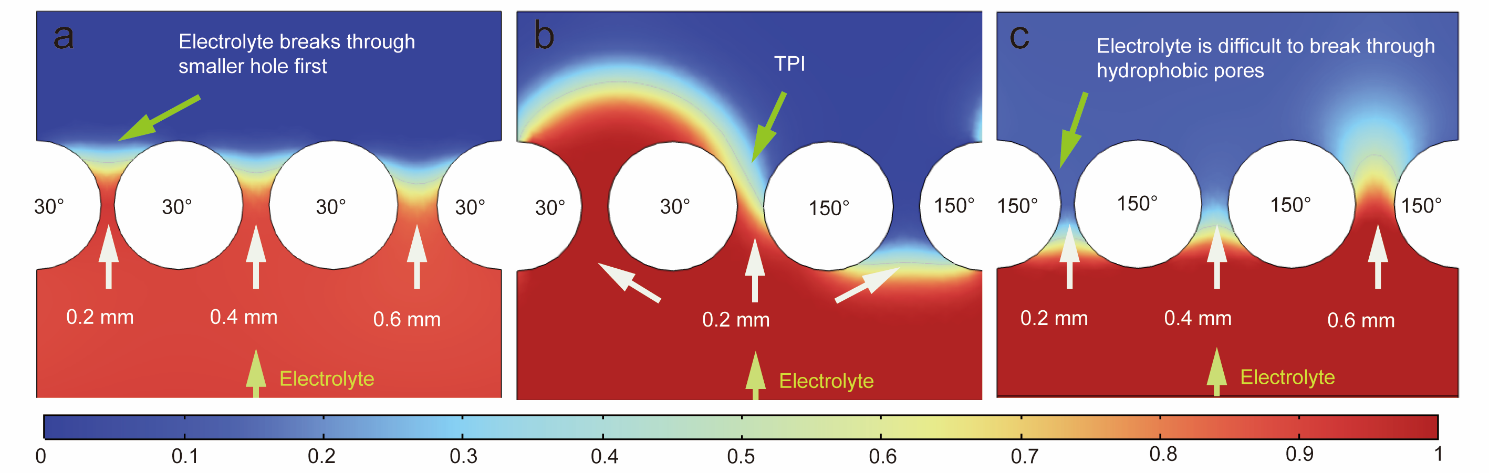


**Supplementary Fig 24 Gas-liquid distribution diagrams for the three structures**. **a** hydrophilic pore of varying sizes. **b** hydrophobic pores of varying sizes, and **c** alternating hydrophilic and hydrophobic pores of the same size. For hydrophilic walls, narrower pores exert stronger capillary forces, making it easier for the liquid to spread and flow upward. In contrast, for hydrophobic walls, surface tension acts as a resistance force, and the resulting capillary force prevents the liquid from entering the pores. Thus, narrower hydrophobic walls are more effective at resisting liquid penetration.However, in the case of walls with identical wettability, complete two-phase displacement occurs, as the liquid experiences equal surface tension on both walls. For walls with differing wettability, an unbalanced force field is formed, which directs the liquid toward the hydrophilic wall. The remaining regions are quickly occupied by gas, ultimately creating a well-defined three-phase interface.


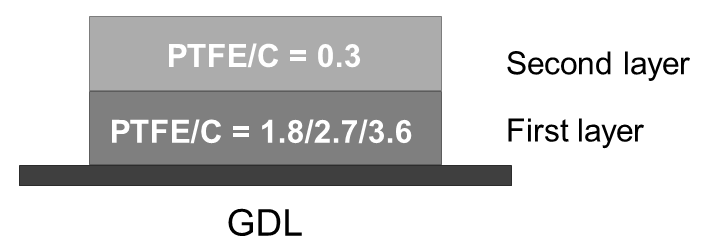


**Supplementary Fig 25.** **Schematic diagrams of PPE-D electrode.**


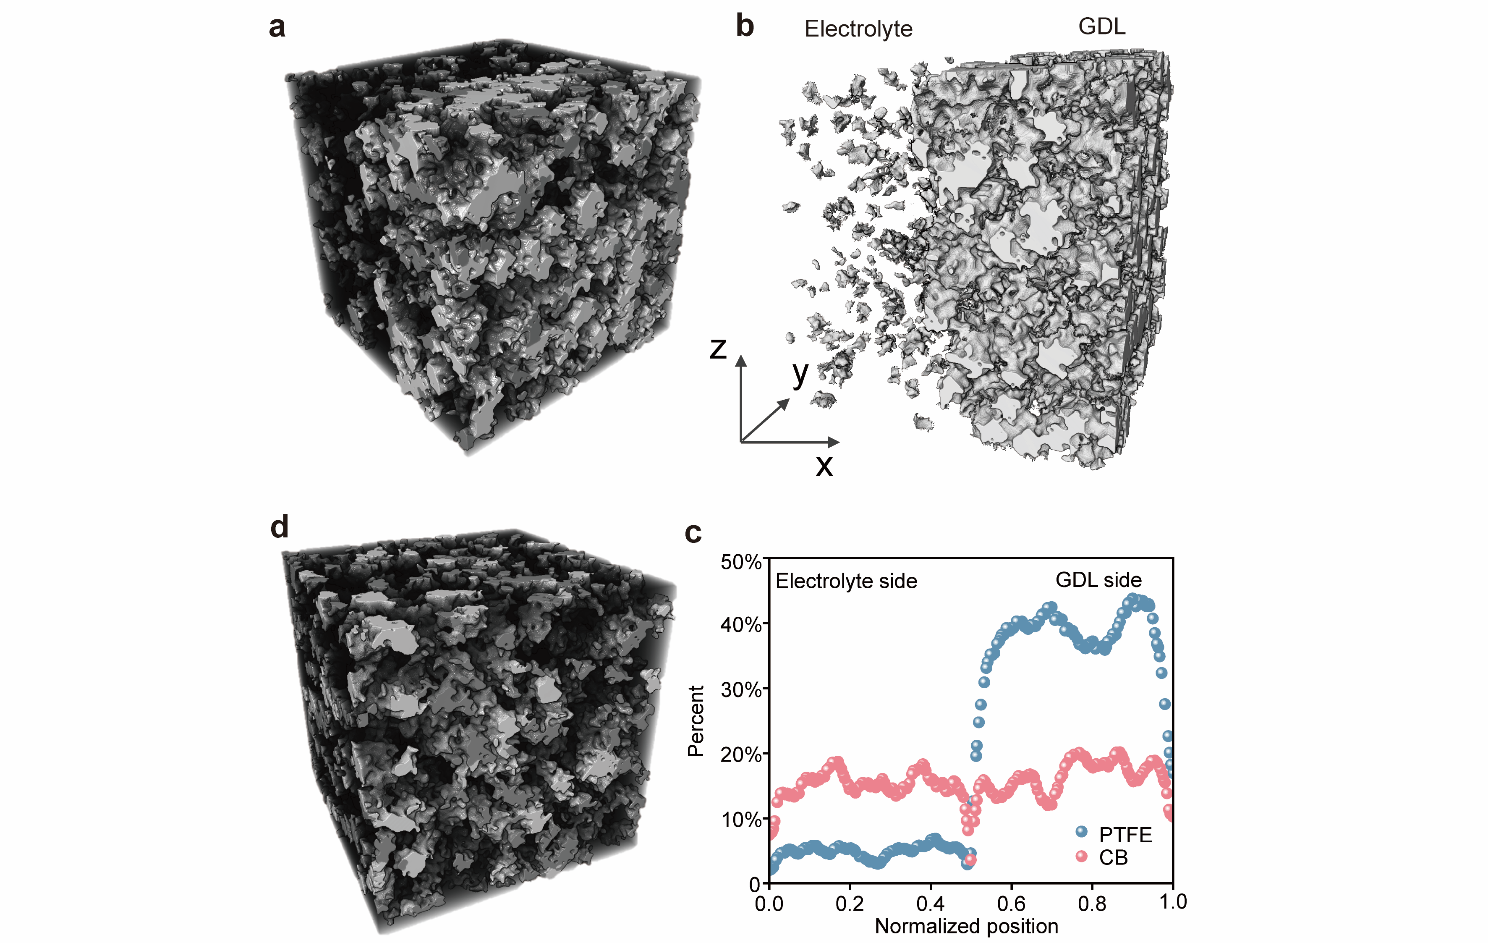


**Supplementary Fig 26. Reconstructed CL architectures and spatial distribution characteristics.** **a** 3D visualization of the CL structure in the PPE-D electrode. **b** Spatial distribution of PTFE within the PPE-D CL. **c** Depth-wise variation in volume fraction of PTFE and CB along the X-axis in the ZY plane of the PPE-D structure. More PTFE was selectively distributed toward the GDL side, while the CB content was kept uniform across the entire CL. **d** 3D visualization of the CL structure in the PPE electrode.


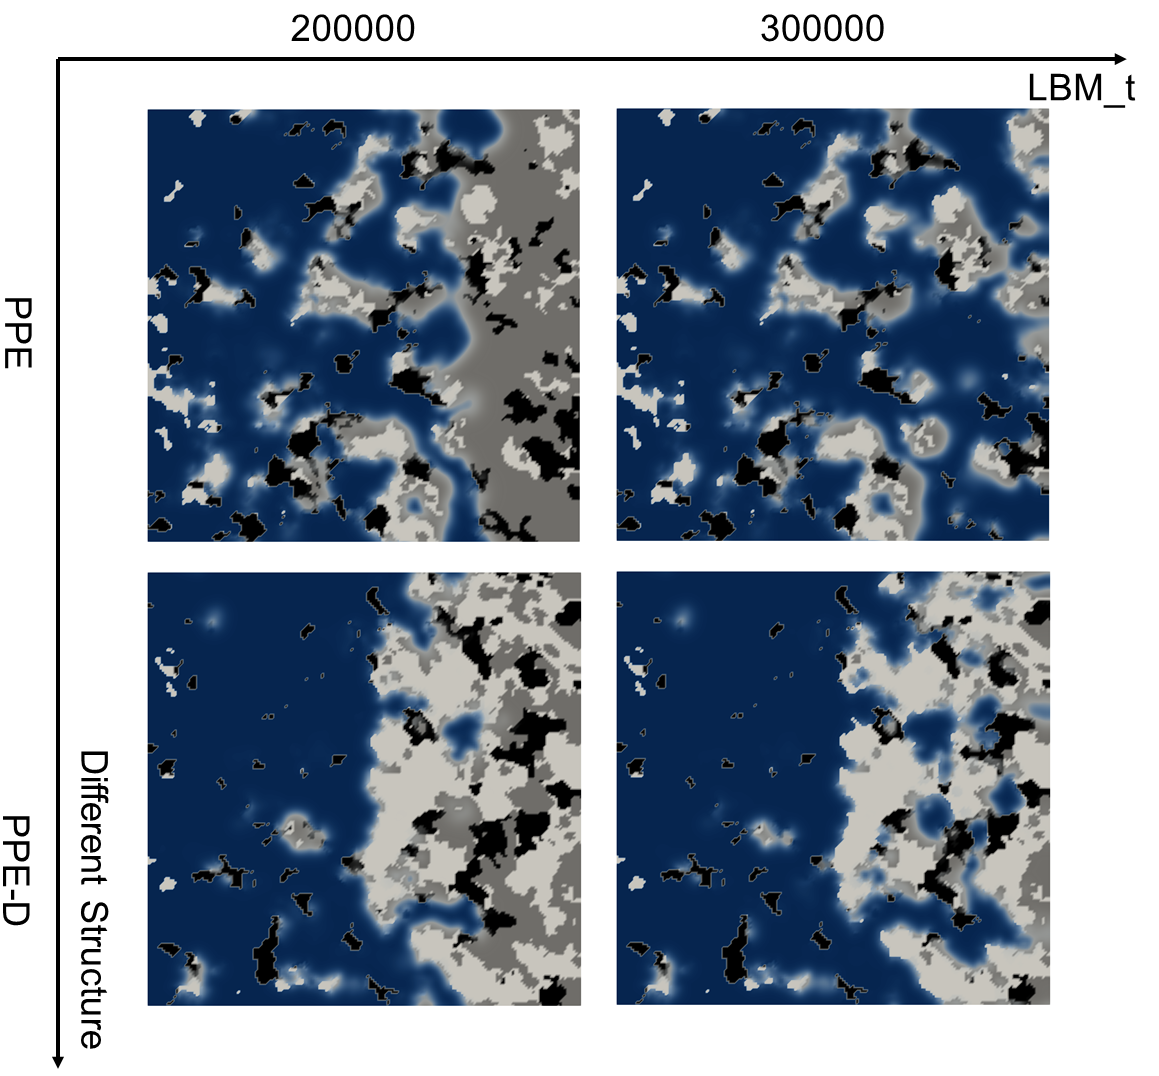


**Supplementary Fig 27.** **Gas-liquid distribution diagrams for two structures at different lattice time steps.** The first layer of the PPE-D CL contains more PTFE and smaller pores. The small hydrophobic pores generate greater capillary resistance, thereby enhancing the resistance of PTFE to electrolyte infiltration. At a lattice time of 300,000, the electrolyte had permeated the full depth of the PPE CL, while in PPE-D, intrusion was limited to a few regions and mostly present as gas–liquid mixtures, thus preserving oxygen diffusion pathways.


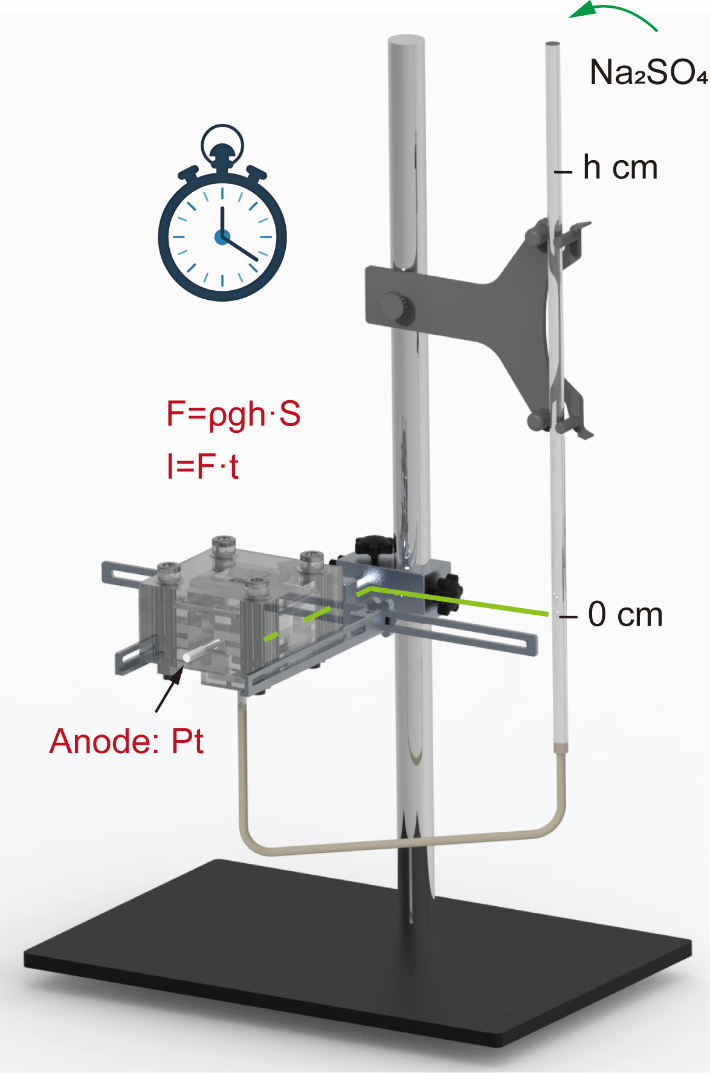


**Supplementary Fig 28.** Schematic of the *in*-*situ* breakthrough impulse resistance measurement.


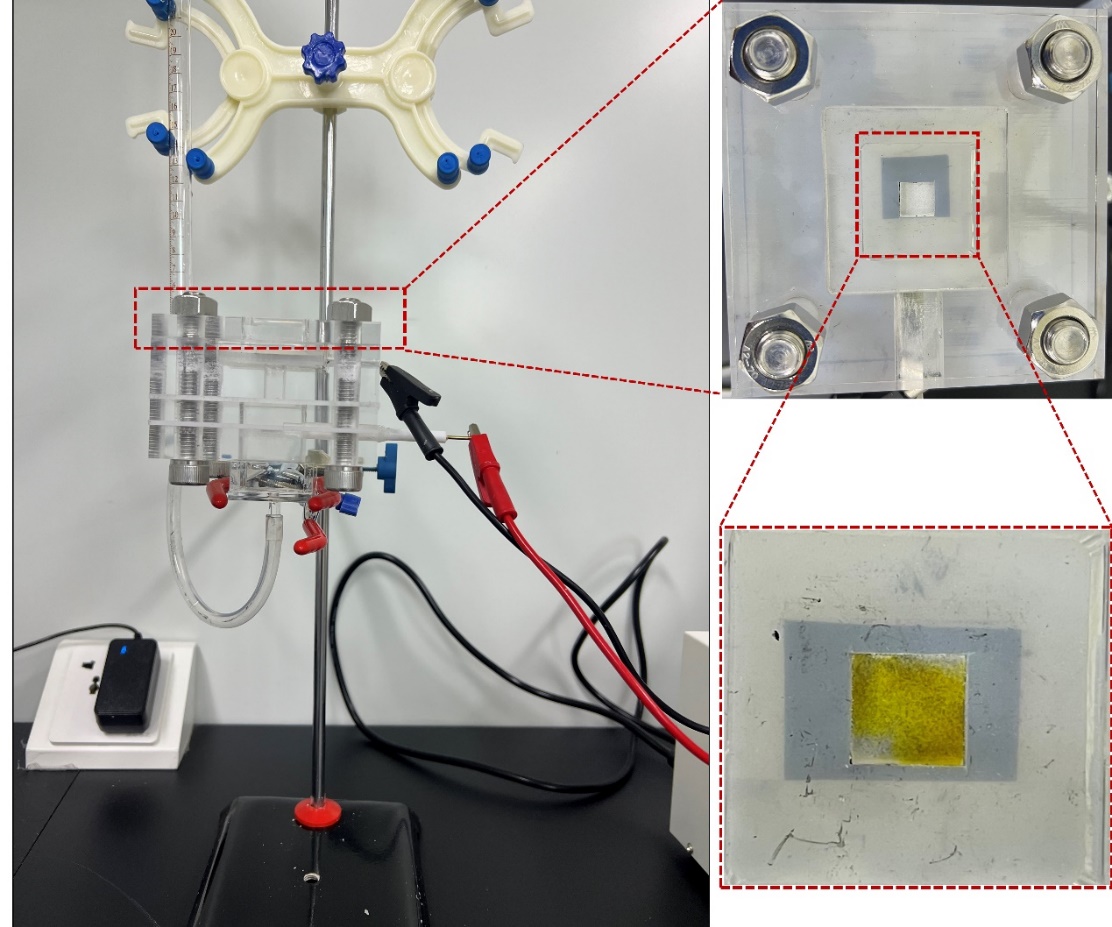


**Supplementary Fig 29. *In*-*situ* resistance impulse testing setup.** To verify that the superior performance of PPE-D stems from its resistance to electrolyte intrusion, we conducted *In*-*situ* tests to evaluate the intrusion resistance of the GDE. The experimental setup and principle are illustrated in Fig. S28. Unlike conventional tests, this *In*-*situ* approach better reflects the GDE’s actual anti-flooding capability, as it simultaneously considers the effects of electrolyte intrusion and electrowetting under realistic operating conditions. In this test, a constant hydrostatic pressure is applied to the catalyst layer (CL) side of the GDE. Upon applying an external voltage, the reaction begins, and the time is recorded. Under the combined effects of the applied pressure and electrowetting, the electrolyte gradually intrudes into the CL. When the electrolyte finally penetrates through to the gas diffusion layer (GDL), it reaches the surface where a hydrogen peroxide indicator strip is placed. A localized color change on the test strip is regarded as the breakthrough point (Fig. S29). The product of the applied pressure and the corresponding breakthrough time is defined as the Resistance Impulse (RI), which serves as a quantitative metric of the GDE’s intrinsic resistance to electrolyte intrusion.


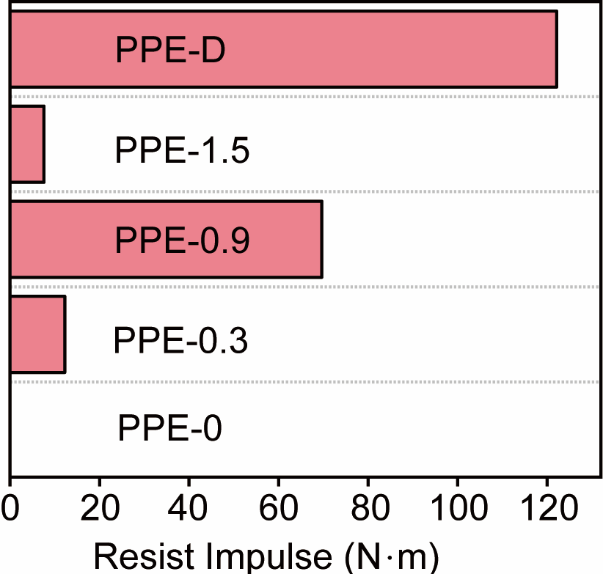


**Supplementary Fig 30.** **Resistance impulse (RI) of different electrodes.**


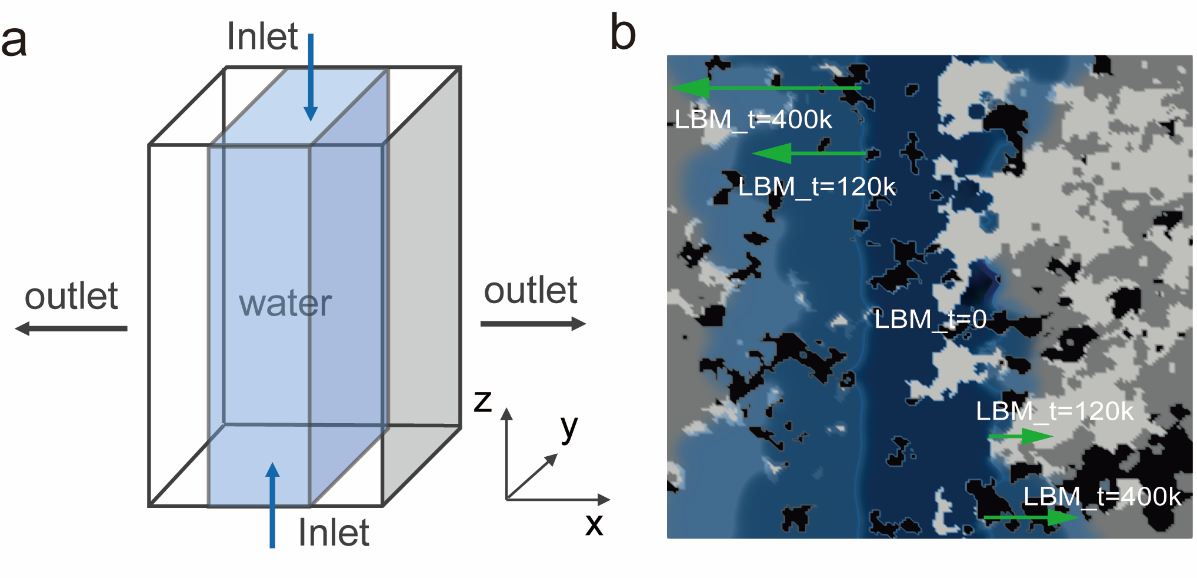


**Supplementary Fig 31** **Boundary conditions and simulation of directional H2O2 transport.** **a** Initial conditions and boundary setup for lattice Boltzmann simulations. A localized water source is introduced at the center of the catalyst layer (CL) domain to mimic in situ H2O2 generation. **b** Spatial distribution of H2O2 at different time steps, visualized by varying shades of blue. The results reveal a spontaneous directional migration of H2O2 toward the left side of the domain, driven by the structural and wettability gradients.


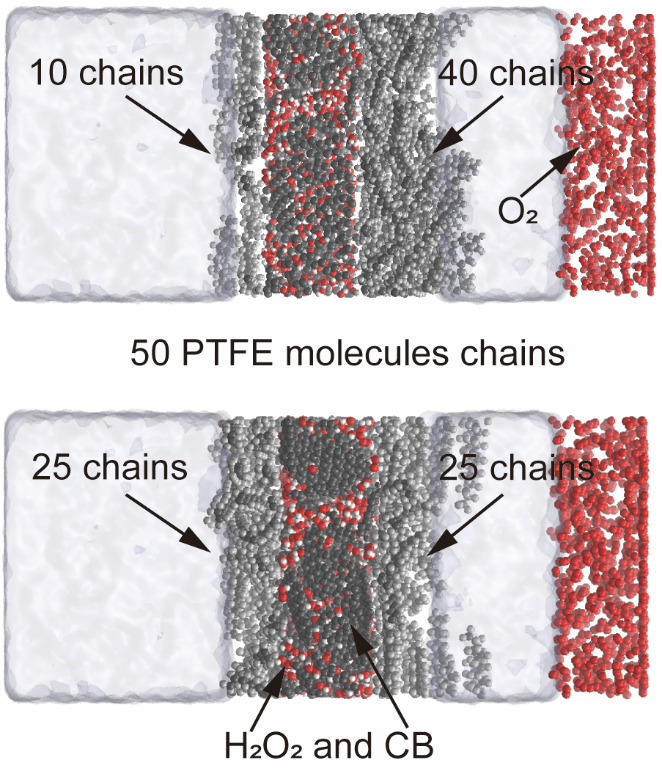


**Supplementary Fig 32. Molecular dynamics quantification of H2O2 diffusivity in gradient and non-gradient CL structures.** PTFE molecules were first placed on both sides of a slice of C54 carbon sheets filled with 300 H2O2 molecules. The first system has 40 chains on right and 10 on the left, and the other system has 25 chains on both sides. For both systems, the right side was filled with 500 O2 molecules and 2000 water molecules, the left side was filled with around 4000 water molecules, resulting in a system size of 5×5×12 nm. On both side of the simulation box, implicit walls were placed to prevent molecules moving to the other side through the periodic boundary. After thousands of steps of energy minimization, the system was equilibrated for 500 ps followed by 4000 ps production molecular dynamics process under the canonic ensemble.


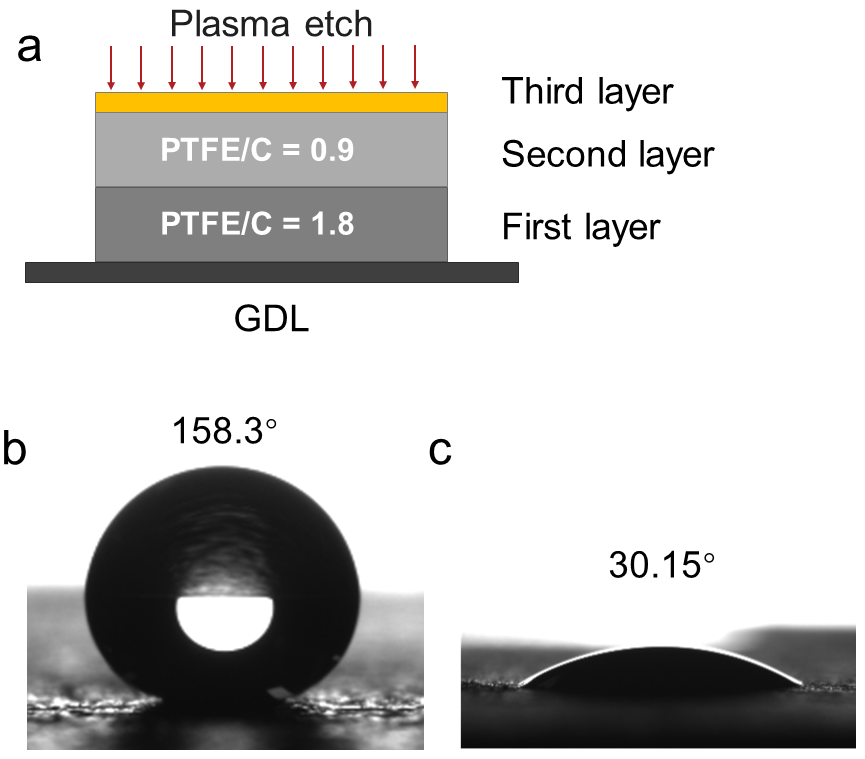


**Supplementary Fig 33.** P**PE electrode with three-layer CL structure (PPE-T).** **a** Schematic diagram of PPE-T electrode. **b** Contact angles of the CL surface before and after **c** plasma etching.


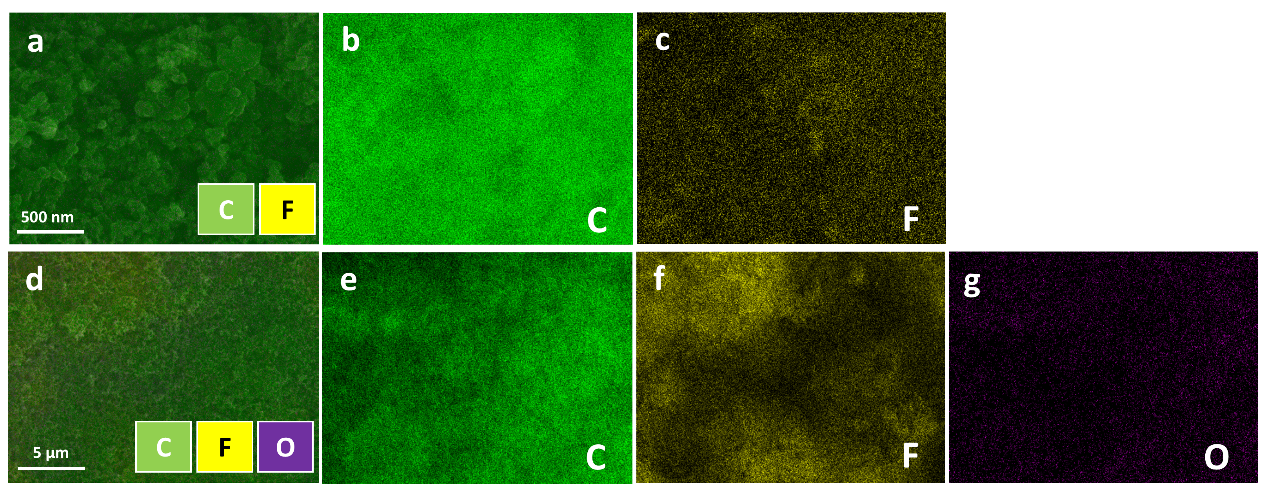


**Supplementary Fig 34.** **Surface energy spectra of the electrode catalytic layer.** (**a**, **b**, **c**) C and F element distribution of unetched electrodes; (**d**, **e**, **f**, **g**) C, F, and O element distribution of etched electrodes.


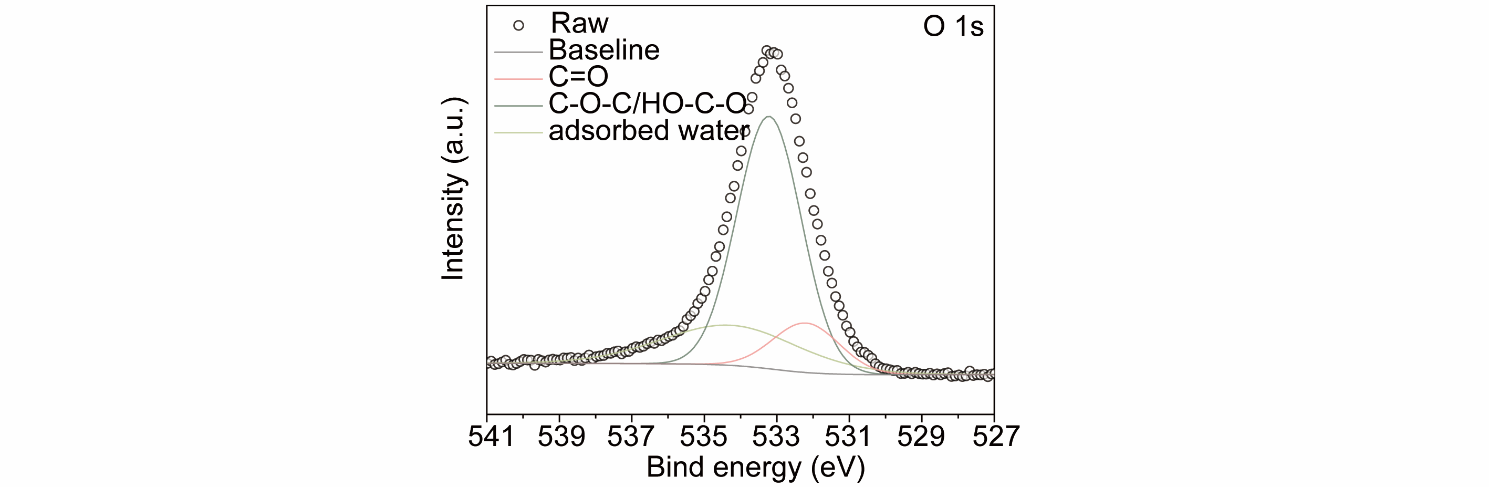


**Supplementary Fig 35. XPS spectra of plasma-treated CL surface.** The O 1s peaks could be deconvoluted into three peaks. According to the literature, the components centered at 532.19 and 533.21 eV were attributed to the C-OH/C-O-C and C=O surface functional groups, respectively2. The last component with B. E. around 534.26eV was characteristic of adsorbed water.


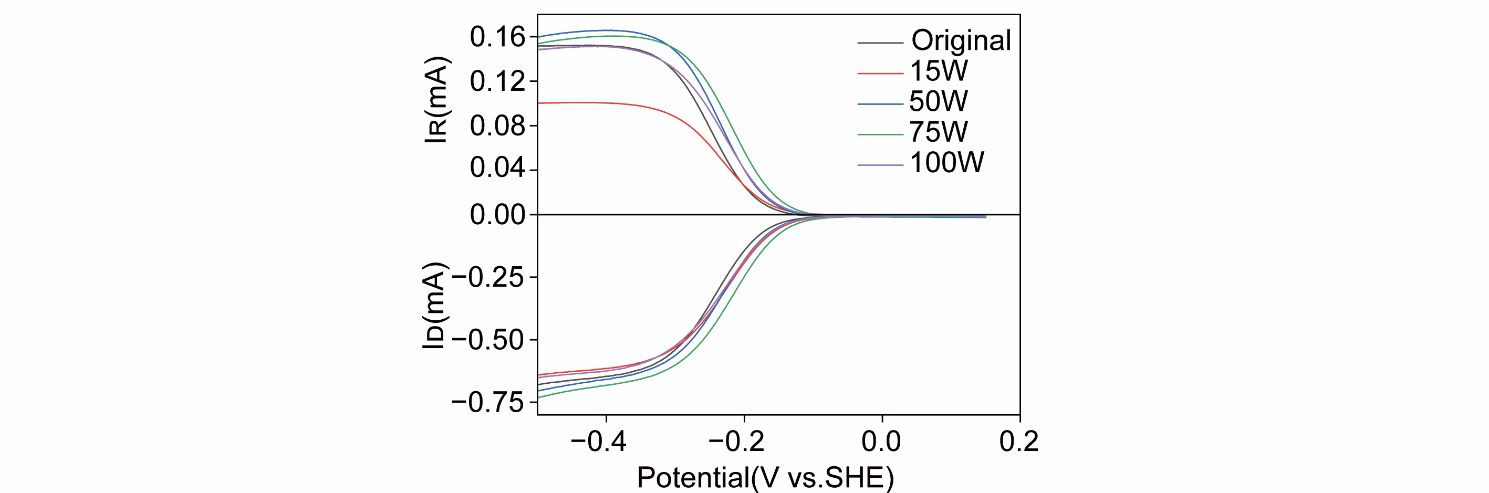


**Supplementary Fig 36. Representative disk and ring current responses of CB from RRDE measurements at different plasma etching powers.**


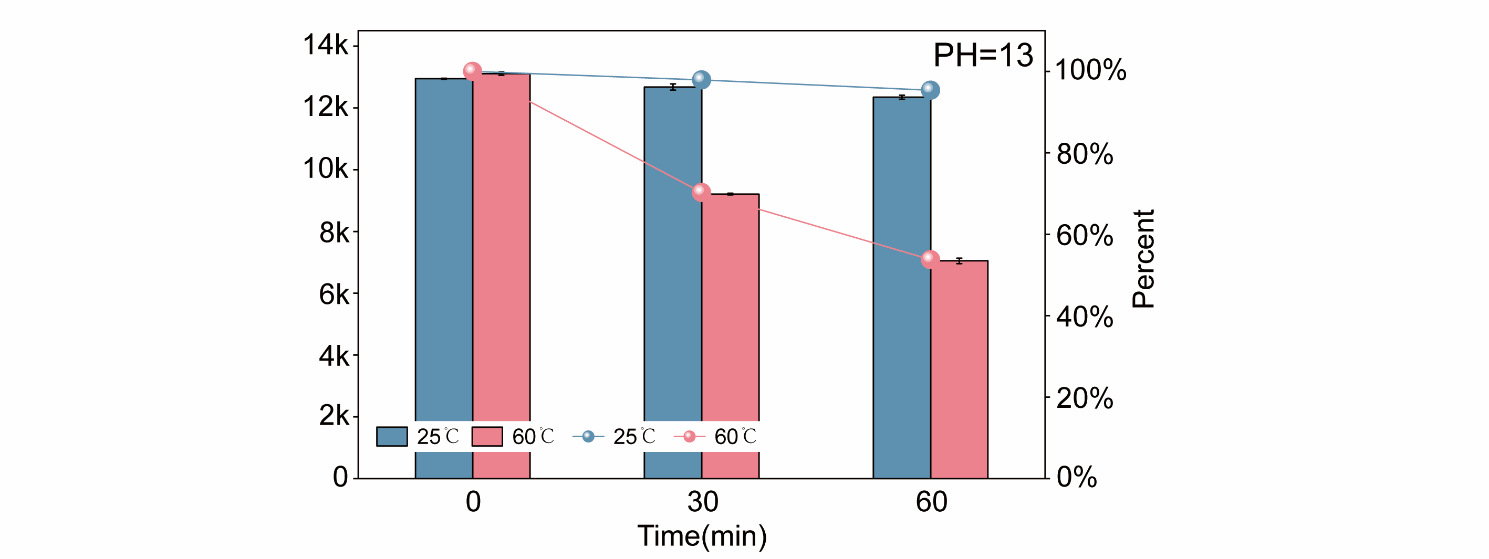


**Supplementary Fig 37. Thermal decomposition of H2O2.**


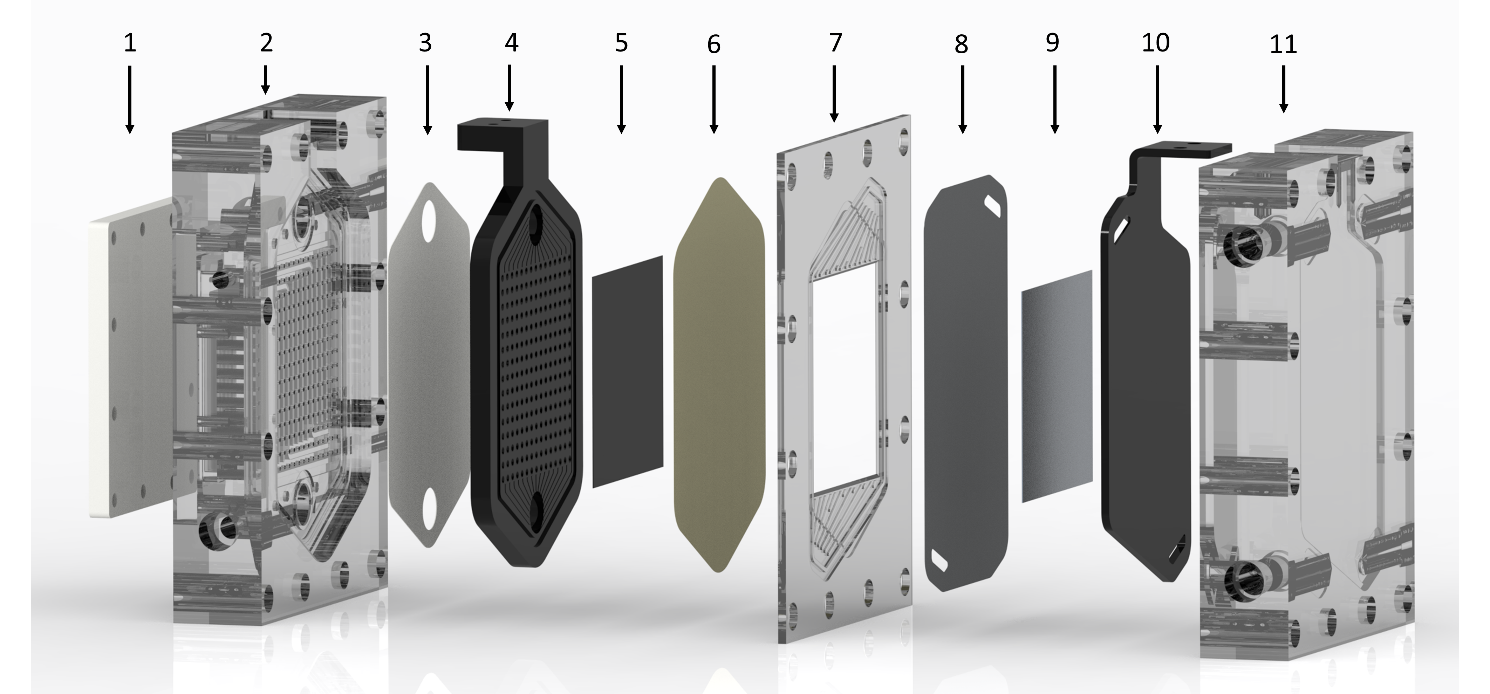


**Supplementary Fig 38.** **Schematic diagram of the dual-membrane solid electrolyte system stack.** 1, End plate, 2, Air chamber, 3, Hydrophobic membrane, 4, Conductive plate, 5, GDE, 6, AEM, 7, SE chamber, 8, PEM, 9, Anode, 10, Conductive plate, 11, Anode chamber.


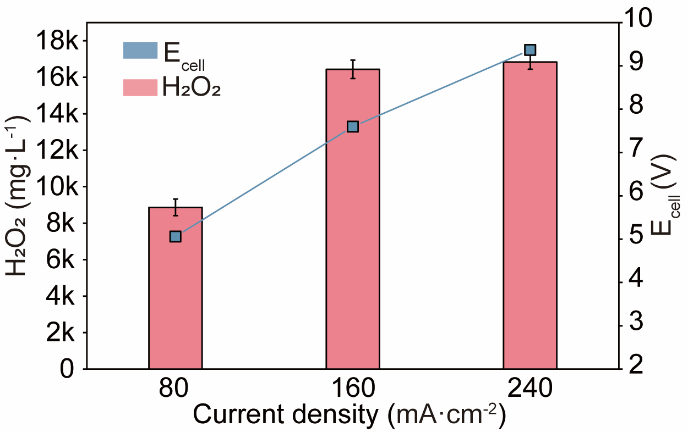


**Supplementary Fig 39. H2O2 yield and cell voltage of PPE-T in a dual-membrane solid-state system under different current densities with hourly cyclic electrolysis.**

1. **Supplementary Tables**

**Supplementary Table 1.** Particle size distribution of catalyst inks with varying PTFE/CB mass ratios.

| No. | Ink | D10 | D25 | D50 | D75 | D90 |
| --- | --- | --- | --- | --- | --- | --- |
| 1 | P/C-0  H2O | 10.44 | 13.68 | 17.91 | 23.06 | 28.48 |
| 2 | P/C-0 Isopropanol | 4.467 | 6.053 | 8.474 | 11.69 | 15.87 |
| 3 | P/C-0.3  Isopropanol | 4.502 | 5.971 | 8.094 | 10.64 | 13.26 |
| 4 | P/C-0.9  Isopropanol | 4.733 | 6.355 | 8.630 | 11.41 | 14.54 |
| 5 | P/C-1.5  Isopropanol | 4.887 | 6.639 | 9.127 | 12.23 | 15.70 |

Since commercial carbon black is typically hydrophobic, it is difficult to achieve uniform dispersion in water, resulting in particle sizes significantly larger than those in isopropanol. The table also shows that the addition of a certain amount of PTFE can significantly reduce the particle size of the ink.3

**Supplementary Table 2.** Different mixing conditions.

| No. | H2O  (mL) | Isopropanol  (mL) | PTFE  (mL) | Temperature  (℃) | Method |
| --- | --- | --- | --- | --- | --- |
| 1 | 4 | 5 | 0.15 | 10 | a |
| 2 | 4 | 5 | 0.15 | 10 | b |
| 3 | 4 | 5 | 0.15 | 10 | c |
| 4 | 4 | 5 | 0.15 | 40 | a |
| 5 | 4 | 5 | 0.15 | 40 | b |
| 6 | 4 | 5 | 0.15 | 40 | c |
| 7 | 2 | 5 | 0.15 | 40 | a |
| 8 | 2 | 5 | 0.15 | 40 | b |
| 9 | 2 | 5 | 0.15 | 40 | c |

**Note**：a : PTFE is added to Isopropanol in a single addition, and then water is added to the mixture of Isopropanol and PTFE.

b : PTFE is first added to water and then added to isopropyl alcohol in one go.

c: The PTFE was first added to the water, and then the mixture of PTFE and water was slowly added drop by drop to the isopropyl alcohol. Keep the solution in an ultrasonic environment at all times

We suspect that the excessively high local concentration of PTFE in alcohol solutions causes an irreversible flocculation reaction, leading to premature precipitation and phase separation before PTFE and CB can combine. **a** shows the mixed state of a high-concentration PTFE emulsion with isopropanol, while **b** shows the mixed state after reducing the PTFE concentration. **c** illustrates the gradual mixing of the diluted PTFE emulsion with isopropanol.

**Supplementary Table 3.** Calculation parameters for the LBM method.

| 3D structure | Boundary size | | | Theta | | Rho | | *v* | | σ | *u* |
| --- | --- | --- | --- | --- | --- | --- | --- | --- | --- | --- | --- |
| Nx | Ny | Nz | PTFE | CB | Water | Air | Water | Air |
| Real | 191 | 288 | 191 | 150° | 100° | 800 | 1 | 0.005 | 0.075 | 0.05 | 0.0005 |
| Local amplification | 400 | 400 | 400 | 150° | 100° | 800 | 1 | 0.005 | 0.075 | 0.05 | 0.0005 |
| QSGS | 191 | 191 | 191 | 150° | 100° | 800 | 1 | 0.005 | 0.075 | 0.05 | 0.0005 |
| PPE-D | 191 | 191 | 191 | 150° | 100° | 800 | 1 | 0.005 | 0.075 | 0.05 | 0.0005 |

**Supplementary Table 4.** *P*i​ values for PTFE and CB in QSGS method.

| No. | PTFE | CB |
| --- | --- | --- |
| *d*1 | 0.01 | 0.01 |
| *d*2 | 0.01 | 0.01 |
| *d*3 | 0.01 | 0.01 |
| *d*4 | 0.01 | 0.01 |
| *d*5 | 0.01 | 0.01 |
| *d*6 | 0.01 | 0.01 |
| *d*7 | 0.01 | 0.01 |
| *d*8 | 0.01 | 0.01 |
| *d*9 | 0.03 | 0.03 |
| *d*10 | 0.03 | 0.03 |
| *d*11 | 0.03 | 0.03 |
| *d*12 | 0.03 | 0.03 |
| *d*13 | 0.03 | 0.03 |
| *d*14 | 0.03 | 0.03 |
| *d*15 | 0.03 | 0.03 |
| *d*16 | 0.03 | 0.03 |
| *d*17 | 0.03 | 0.03 |
| *d*18 | 0.03 | 0.03 |
| *d*19 | 0.02 | 0.02 |
| *d*20 | 0.02 | 0.02 |
| *d*21 | 0.02 | 0.02 |
| *d*22 | 0.02 | 0.02 |
| *d*23 | 0.02 | 0.02 |
| *d*24 | 0.02 | 0.02 |
| *d*25 | 0.02 | 0.02 |
| *d*26 | 0.02 | 0.02 |

**Supplementary Table 5.** Growth parameters for five randomly reconstructed structures.

| structure |  | (1) | (2) | (3) | (4) | (5) |
| --- | --- | --- | --- | --- | --- | --- |
| *P*c | PTFE | 0.0005 | 0.0005 | 0.0005 | 0.001 | 0.002 |
| CB | 0.005 | 0.005 | 0.005 | 0.005 | 0.005 |
| *R*p | PTFE | 0.05 | 0.15 | 0.3 | 0.15 | 0.15 |
| CB | 0.2 | 0.2 | 0.2 | 0.2 | 0.2 |
| Porosity | | 0.75 | 0.65 | 0.5 | 0.65 | 0.65 |

**Supplementary Table 6.** Performance comparison of electrodes prepared using different strategies (as shown in Figure 6 in the main text).

| No. | Date | O2 source | Electrolyzer structure | Cathode catalyst | Binder | Anode catalyst | Electrode area （cm2） | Electrolytes | Current density  （mA/cm2） | Reaction time per cycle（h） | Total reaction time (h) | Electrolyte volume（ml） | concentration (mg/L) | FE | Ref. |
| --- | --- | --- | --- | --- | --- | --- | --- | --- | --- | --- | --- | --- | --- | --- | --- |
| 1 | 2014 | additional oxygen | undivided | Acetylene black | PTFE | Pt | 1 | Na2SO4 (0.05mol/L) | 48 | 2.5 | 87.5 | 200 | 365.1 | 0.79 | 4 |
| 2 | 2016 | additional oxygen | undivided | M-CB | PTFE | Ti/IrO2-RuO2 | 3.14 | Na2SO4 (0.05mol/L) | 32 | 2 | 20 | 100 | 595 | 0.45 | 5 |
| 3 | 2016 | additional oxygen | undivided | Commercial CB | PTFE | DSA/IrO2 | 7 | Na2SO4 (0.05mol/L) | 7 | 3 | 3 | 200 | 566 | 0.6 | 6 |
| 53.6 | 3 | 3 | 200 | 2160 | 0.3 |
| 35.7 | 3 | 30 | 200 | 1930 | 0.35 |
| 4 | 2018 | additional oxygen | undivided | ZrO2/C | PTFE | Pt | 20 | K2SO4 (0.1mol/L) | 10 | / | 2 | / | / | 0.1 | 7 |
| 25 | / | 2 | / | / | 0.13 |
| 50 | / | 2 | / | / | 0.13 |
| 150 | / | 2 | / | / | 0.02 |
| 5 | 2018 | Open air | undivided | GF/RVC | / | Ti-MMO/IrO2-Ta2O5 | 9.52 | Na2SO4 (0.05mol/L) | 16.67 | 0.83 | 0.83 | 180 | 61.7 | 0.21 | 8 |
| 6 | 2019 | additional oxygen | divided | Commercial CB | PTFE | Graphite Felt | / | Na2SO4 (0.05mol/L) | 110 | / | 4 | / | 1230 | 0.88 | 9 |
| 7 | 2019 | Open air | divided | Commercial CB /graphite | PTFE | Ti/IrO2 | / | Na2SO4 (0.05mol/L) | 15 | 1 | 9 | 300 | 181 | 0.82 | 10 |
| 8 | 2019 | Open air | undivided | Commercial CB /graphite | PTFE | Pt | 7 | Na2SO4 (0.05mol/L) | 15 | 1 | 6 | / | 2666 | 0.84 | 11 |
| 9 | 2019 | additional oxygen | divided | M-N-C | Nafion | Ti/Ir-MMO | 10 | KOH (0.1mol/L) | 50 | / | 6 | / | / | 0.46 | 12 |
| 10 | 2020 | Open air | undivided | Commercial CB | PTFE | IrO2 - RuO2/Ti | 5.1 | Na2SO4 (0.05mol/L) | 60 | 2 | 10 | 250 | 1122 | 0.72 | 13 |
| 240 | 1 | 1 | 250 | 2074.068 | 0.67 |
| 11 | 2020 | additional oxygen | divided | СМК-3 | PTFE | Pt | 5 | 0.375М К2SO4+0.025М H2SO4 | 100 | 5 | 5 | 20 | 81940 | 0.87 | 14 |
| 12 | 2020 | additional oxygen | undivided | CNTs | PTFE | Pt | 18 | 0.1M Na2SO4+0.05M H2SO4 | 14 | 2 | 2 | 400 | 600 | 0.8 | 15 |
| 13 | 2020 | additional oxygen | divided | С40 | PTFE | Pt | / | 0.05М K2SO4+0.01M H2SO4 | 150 | 6 | 6 | / | 90780 | 0.8 | 16 |
| 14 | 2021 | additional oxygen | undivided | CNT/NCB | PTFE | DSA | 7 | Na2SO4 (0.2mol/L) | 57.143 | 2 | 2 | 200 | 600 | 0.24 | 17 |
| 15 | 2021 | additional oxygen | divided | NPC | Nafion | Pt or Ti/IrO2 | 1 or 4 | KOH (1mol/L) | 100 | / | 200 | / | 11730 | 0.97 | 18 |
| 16 | 2021 | Open air | divided | Commercial CB | Nafion | / | 25 | PBS （100mol/L） | 1 | 4 | 4 | 100 | 100 | 0.16 | 19 |
| 17 | 2021 | additional oxygen | / | CNT-O | / | Ti/IrO2 | / | H2SO4 (0.5mol/L) | 50 | / | 11 | / | / | 0.6 | 20 |
| 18 | 2022 | Open air | divided | Commercial CB | Nafion | / | 12.6 | NaClO4 (0.1mol/L) | 35 | 3.67 | 3.67 | 30 | 20000 | 0.58 | 21 |
| 19 | 2022 | Open air | divided | graphene oxide | PTFE | Ti/IrO2 | 7 | Na2SO4 (0.05mol/L) | 20 | 0.5 | 5 | 350 | / | 0.81 | 22 |
| 20 | 2022 | Open air | / | / | / | / | / | / | 90 | / | 3 | / | / | 0.77 | 23 |
| 21 | 2022 | additional oxygen | divided | Commercial CB | Nafion | Ti/IrO2&/RuO2 | 16 | Na2SO4 (0.1mol/L) | 30 | / | 98 | / | 2301.3 | 0.70 | 24 |
| 22 | 2022 | Open air | undivided | Commercial CB /graphite | PTFE | Ti/IrO2 | 232.5 | Na2SO4 (0.05mol/L) | 30 | 1 | 1 | 2000 | 551 | 0.5 | 25 |
| 23 | 2022 | Open air | undivided | Graphite | PTFE | BBD | 6 | Na2SO4 (0.05mol/L) | 100 | 1 | 1 | 100 | 2658 | 0.70 | 26 |
| 24 | 2022 | Open air | undivided | O-BC | PTFE | Ti/IrO2 | 4 | Na2SO4 (0.05mol/L) | 70 | 1 | 1 | 200 | 600 | 0.68 |
| 100 | 1 | 1 | 200 | 813.8 | 0.64 |
| 70 | 1 | 10 | 200 | 600 | 0.68 |
| 25 | 2023 | Open air | undivided | Commercial CB | PTFE | Pt | 7.065 | Na2SO4 (0.05mol/L) | 30 | 1 | 1000 | 100 | 1250 | 0.93 | 27 |
| 100 | 1 | 200 | 100 | 4200 | 0.94 |
| Ti- Pt | 240 | Na2SO4 (0.05mol/L) | 100 | 1 | 200 | 12000 | 1150 | 0.91 |
| 300 | 1 | 100 | 4000 | 10000 | 0.88 |
| 26 | 2023 | additional oxygen | divided | ZrO2-CMK-3 | PTFE | Pt | 1 | Na2SO4 (0.1mol/L) | 100 | 1 | 10 | / | / | 0.85 | 28 |
| 252 | 1 | 1 | / | / | 0.9 |
| 27 | 2023 | additional oxygen | divided | Commercial CB | PTFE | Ti/IrO2/Ta2O5 | 25 | Na2SO4 (1mol/L) | 200 | 2 | / | 100 | 34000 | 0.54 | 29 |
| Na2SO4 (0.5mol/L) | 200 | 14 | 322 | 1400 | 19000 | 0.6 |
| Na2SO4 (0.5mol/L) | 200 | 14 | 350 | 1400 | 5100 | 0.16 |
| Na2SO4 (0.5mol/L) | 150 | 14 | 700 | 1400 | 17500 | 0.74 |
| Na2SO4 (0.5mol/L) | 150 | 14 | 1000 | 1400 | 17500 | 0.74 |
| 28 | 2023 | Open air | undivided | O-BC | PTFE\Nafion | Ti/IrO2 | 4 | Na2SO4 (0.05mol/L) | 70 | 1 | 1 | 200 | 663.8 | 0.75 | 30 |
| 29 | 2023 | additional oxygen | divided | Co-Nx-C | Nafion | Pt | 1.44 | Na2SO4 (0.5mol/L) | 60 | 24 | 24 | 40 | 26000 | 0.79 | 31 |
| 100 | 12 | 48 | 40 | 3000 | 0.65 |
| 30 | 2023 | additional oxygen | divided | Commercial CB | PTFE | / | / | / | 70 | / | 50 | / | 7480 | 0.9 | 32 |
| 31 | 2023 | additional oxygen | / | Commercial CB | PTFE | CP/C+PTFE | 4 | NaOH (1.5mol/L) | 100 | 10 | 50 | 100 | 23120 | 0.99 | 33 |
| 32 | 2024 | additional oxygen | divided | CNT | Nafion | Pt | 3 | KOH (1mol/L) | 200 | / | 230 | / | / | 0.95 | 34 |
| 33 | 2024 | additional oxygen | divided | Commercial CB | PTFE | Ti/RuO2 | 9 | Na2SO4 (1mol/L) | 150 | / | 160 | / | / | 0.8 | 35 |
| 34 | 2024 | additional oxygen | divided | Commercial CB | PTFE | Ni | 20 | KOH (1mol/L) | 500 | / | 23 | / | / | 0.97 | 36 |
| 35 | 2024 | additional oxygen | divided | Commercial CB | Nafion | Ti/IrO2 | 25 | Na2SO4 (0.1mol/L) | 120 | 7.5 | 7.5 | 200 | 14900 | 0.2 | 37 |
| 36 | 2024 | additional oxygen | divided | Commercial CB | PTFE | Ti/IrO2 | 25 | Na2SO4 (0.1mol/L) | 30 | 2 | 20 | 200 | / | 0.9 | 38 |
| 37 | 2024 | additional oxygen | divided | CMK-3 | Nafion | IrOx/Ti | 9 | Solid electrolyte  （50WX8 ） | 400 | 0.5 | 0.5 | 15 | 42500 | 0.83 | 39 |
| 38 | 2024 | additional oxygen | divided | mesoporous carbon | Nafion | RuO2 | 1 | KOH (0.1mol/L) | 200 | 24 | 24 | 40 | 72400 | 0.95 | 40 |
| 39 | 2024 | additional oxygen | divided | Commercial CB | PTFE | IrO2 - RuO2/Ti | 1 | Na2SO4 (0.1mol/L) | 100 | 3 | 3 | 40 | / | 0.98 | 41 |
| 200 | 3 | 3 | 40 | / | 0.9 |
| 300 | 3 | 3 | 40 | / | 0.7 |
| 40 | 2024 | additional oxygen | undivided | Boron-doped rGO | PTFE | Pt | 3 | Na2SO4 (0.05mol/L) | 60 | 1 | 1 | 200 | 443 | 0.78 | 42 |
| 30 | 1 | 1 | 200 | 225 | 0.79 |
| 100 | 1 | 1 | 200 | 630 | 0.66 |
| 150 | 1 | 1 | 200 | 825 | 0.58 |
| 200 | 1 | 1 | 200 | 952.35 | 0.50 |
| 60 | 1 | 6 | 200 | 425 | 0.74 |

**Supplementary Table 7.** Cost analysis for the electrosynthesis of pure H₂O₂.

| Project | Categories | | Cost | **Total costa** |
| --- | --- | --- | --- | --- |
| Investment cost | Cell | Plastic frame | 41.50 $/cell | 73.79$b |
| bipolar plate | 27.67 $/cell |
| PEM | 0.076 $/cm2 |
| AEM | 0.080 $/cm2 |
| solid electrolyte | 0.0715 $/g |
| Anode | IrO2 | 0.192 $/mg | 4.8$ |
| GDE | GDL(commercial CP) | 0.064 $/cm2 | 1.627$c |
| Catalyst(commercial CB) | 0.00003 $/mg |
| Binder（PTFE） | 0.000035 $/mg |
| Production costs | System electricity consumption | | 0.05 $/KWh | 0.00275$/hd |
| Oxygen consumption | |

**Note:** All prices are based on purchases in China and converted to USD using the current exchange rate of 7.2778 RMB/USD.

a **Total cost** calculated based on a single stack and an electrode area of 25 cm²

b **Stack cost** is calculated based on the material costs required to support the GDE with the specified area, and the mass of the solid electrolyte is calculated based on the actual amount loaded into the stack, i.e., 10 g/cell.

c **Catalyst and binder costs** in the GDE are calculated according to the loading amounts required for our electrode fabrication process. The CB loading is 16.7 mg/cm² (higher than the electrode catalyst loading due to partial catalyst overspray during the spraying process), and the PTFE loading is 15 mg/cm².

d **Electricity cost** is calculated based on the average industrial electricity price in China. Oxygen is supplied by an oxygen generator with a power of 130 W and a flow rate of 1 L/min. Given a system oxygen flow rate of 250 mL/min, the actual operating power is 32.5 W.

**Supplementary Table 8.** Cost analysis for the electrosynthesis of alkaline H₂O₂.

| Project | Categories | | Cost | **Total costa** |
| --- | --- | --- | --- | --- |
| Investment cost | Cell | PEEK plate | 41.22 $/cell | 178.7 $b |
| bipolar plate | 137.4 $/cell |
| PEM | 0.076 $/cm2 |
| Anode | Ni | 9.62 $/ cell | 16.02 $ |
| GDE | GDL(commercial CP) | 0.064 $/cm2 | 6.508 $c |
| Catalyst(commercial CB) | 0.00003 $/mg |
| Binder（PTFE） | 0.000035 $/mg |
| Production costs | System electricity consumption | | 0.05 $/KWh  0.055 $/L | 0.0045 $/hd |
| 32 wt.%NaOH electrolyte | |

**Note:** All prices are based on purchases in China and converted to USD using the current exchange rate of 7.2778 RMB/USD.

a **Total cost** calculated based on a stack and an electrode area of 100 cm²

b **Stack cost** is calculated based on the material costs required to support the GDE with the specified area.

c **Catalyst and binder costs** in the GDE are calculated according to the loading amounts required for our electrode fabrication process. The CB loading is 16.7 mg/cm² (higher than the electrode catalyst loading due to partial catalyst overspray during the spraying process), and the PTFE loading is 15 mg/cm².

d Production costs include electricity and anode electrolyte consumption costs. Anode electrolyte consumption is calculated as 80 ml per hour.

1. **Supplementary References**

1. Terao T*, et al.* Development of novel three-dimensional reconstruction method for porous media for polymer electrolyte fuel cells using focused ion beam-scanning electron microscope tomography. *J. Power Sources* **347**, 108-113 (2017).

2. Xia C, Xia Y, Zhu P, Fan L, Wang H. Direct electrosynthesis of pure aqueous H2O2 solutions up to 20% by weight using a solid electrolyte. *Science* **366**, 226 (2019).

3. Pan WT, Chen ZK, Yao DS, Chen XL, Wang FC, Dai G. Microstructure and macroscopic rheology of microporous layer nanoinks for PEM fuel cells. *Chem. Eng. Sci.* **246**, 14 (2021).

4. Sheng YP, Zhao Y, Wang XL, Wang R, Tang T. Electrogeneration of H2O2 on a composite acetylene black-PTFE cathode consisting of a sheet active core and a dampproof coating. *Electrochim. Acta* **133**, 414-421 (2014).

5. Liang L, An Y, Zhou M, Yu F, Liu M, Ren GJJoECE. Novel rolling-made gas-diffusion electrode loading trace transition metal for efficient heterogeneous electro-Fenton-like. *J. Environ. Chem. Eng.* **4**, 4400-4408 (2016).

6. Yu XM, Zhou MH, Ren GB, Ma L. A novel dual gas diffusion electrodes system for efficient hydrogen peroxide generation used in electro-Fenton. *Chem. Eng. J.* **263**, 92-100 (2015).

7. Carneiro JF*, et al.* Simultaneous degradation of hexazinone and diuron using ZrO2-nanostructured gas diffusion electrode. *Chem. Eng. J.* **351**, 650-659 (2018).

8. Zhou W*, et al.* "Floating" cathode for efficient H2O2 electrogeneration applied to degradation of ibuprofen as a model pollutant. *Electrochem. Commun.* **96**, 37-41 (2018).

9. Ding PP, Cui LL, Li D, Jing WH. Innovative Dual-Compartment Flow Reactor Coupled with a Gas Diffusion Electrode for in Situ Generation of H2O2. *Ind. Eng. Chem. Res.* **58**, 6925-6932 (2019).

10. An JK*, et al.* Highly efficient electro-generation of H2O2 by adjusting liquid-gas solid three phase interfaces of porous carbonaceous cathode during oxygen reduction reaction. *Water Res.* **164**, 10 (2019).

11. Zhao Q*, et al.* Superhydrophobic Air-Breathing Cathode for Efficient Hydrogen Peroxide Generation through Two-Electron Pathway Oxygen Reduction Reaction. *ACS Appl. Mater. Interfaces* **11**, 35410-35419 (2019).

12. Sun Y*, et al.* Activity-Selectivity Trends in the Electrochemical Production of Hydrogen Peroxide over Single-Site Metal-Nitrogen-Carbon Catalysts. *J. Am. Chem. Soc.* **141**, 12372-12381 (2019).

13. Zhang QZ, Zhou MH, Ren GB, Li YW, Li YC, Du XD. Highly efficient electrosynthesis of hydrogen peroxide on a superhydrophobic three-phase interface by natural air diffusion. *Nat. Commun.* **11**, 11 (2020).

14. Kolyagin GA, Kornienko VL. The Effect of Polytetrafluoroethylene Content in Porous Carbon Materials on Their Structural and Electrochemical Characteristics by the Example of Oxygen Reduction to Hydrogen Peroxide. *Russ. J. Electrochem.* **56**, 485-491 (2020).

15. Wang JS*, et al.* Technological Optimization for H2O2 Electrosynthesis and Economic Evaluation on Electro-Fenton for Treating Refractory Organic Wastewater. *Ind. Eng. Chem. Res.* **59**, 10364-10372 (2020).

16. Kornienko VL, Kolyagin GA, Kornienko GV, Parfenov VA. Comparative Study of the Efficiency of New Technical Carbons СН210 and С40 in Electrosynthesis of Н2О2 from О2 in Gas-Diffusion Electrodes on Their Basis. *Russ. J. Electrochem.* **56**, 781-784 (2020).

17. Lu J, Liu XC, Chen QY, Zhou J. Coupling effect of nitrogen-doped carbon black and carbon nanotube in assembly gas diffusion electrode for H2O2 electro-generation and recalcitrant pollutant degradation. *Sep. Purif. Technol.* **265**, 15 (2021).

18. Cao PK, Quan X, Zhao K, Zhao XY, Chen S, Yu HT. Durable and Selective Electrochemical H2O2 Synthesis under a Large Current Enabled by the Cathode with Highly Hydrophobic Three-Phase Architecture. *Acs Catal.* **11**, 13797-13808 (2021).

19. Murawski E, Kananizadeh N, Lindsay S, Rao AM, Popat SC. Decreased gas-diffusion electrode porosity due to increased electrocatalyst loading leads to diffusional limitations in cathodic H2O2 electrosynthesis. *J. Power Sources* **481**, 9 (2021).

20. Chen SY*, et al.* Chemical Identification of Catalytically Active Sites on Oxygen-doped Carbon Nanosheet to Decipher the High Activity for Electro-synthesis Hydrogen Peroxide. *Angew. Chem.-Int. Edit.* **60**, 16607-16614 (2021).

21. Li HH, Quispe-Cardenas E, Yang SS, Yin LF, Yang Y. Electrosynthesis of >20 g/L H2O2 from Air. *Acs Est. Eng.* **2**, 242-250 (2022).

22. Li W*, et al.* Thermal reduced graphene oxide enhanced in-situ H2O2 generation and electrochemical advanced oxidation performance of air-breathing cathode. *Environ. Res.* **204**, 8 (2022).

23. Zhang EH*, et al.* Engineering the Local Atomic Environments of Indium Single-Atom Catalysts for Efficient Electrochemical Production of Hydrogen Peroxide. *Angew. Chem.-Int. Edit.* **61**, 10 (2022).

24. Yiying Z*, et al.* On-site H2O2 electro-generation process combined with ultraviolet: a promising approach for odorous compounds purification in drinking water system. *Chem. Eng. J.* **430**, 132829 (2022).

25. An JK, Feng YJ, Wang NY, Zhao Q, Wang X, Li N. Amplifying anti-flooding electrode to fabricate modular electro-fenton system for degradation of antiviral drug lamivudine in wastewater. *J. Hazard. Mater.* **428**, 11 (2022).

26. Wang SL*, et al.* Engineering a concordant microenvironment with air-liquid-solid interface to promote electrochemical H2O2 generation and wastewater purification. *Sep. Purif. Technol.* **297**, 9 (2022).

27. Cui LL*, et al.* An anti-electrowetting carbon film electrode with self-sustained aeration for industrial H2O2 electrosynthesis. *Energ Environ. Sci.* **17**, 655-667 (2024).

28. Li L*, et al.* Efficient H2O2 Electrosynthesis and Its Electro-Fenton Application for Refractory Organics Degradation. *Engineering* **30**, 131-143 (2023).

29. Zhao ER, Xia GS, Li Y, Zhan JH, Yu G, Wang YJ. Technoeconomic Assessment of Electrochemical Hydrogen Peroxide Production with Gas Diffusion Electrodes under Scenarios Relevant to Practical Water Treatment. *Acs Est. Eng.* **3**, 1800-1812 (2023).

30. Wang SL*, et al.* Beyond the catalyst: A robust and omnidirectional hydrophobic triple-phase architecture for ameliorating air-breathing H2O2 electrosynthesis and wastewater remediation. *Sep. Purif. Technol.* **305**, 11 (2023).

31. Sui WB, Li WZ, Zhang ZS, Wu WX, Xu ZY, Wang Y. Efficient and durable electrochemical oxygen reduction to H2O2 in acidic media assisted through catalyst layer design. *J. Power Sources* **556**, 7 (2023).

32. Rawah BS, Albloushi M, Li WZ. Electro-synthesis of pure aqueous H2O2 on nitrogen-doped carbon in a solid electrolyte flow cell without using anion exchange membrane. *Chem. Eng. J.* **466**, 13 (2023).

33. Wei JC, Yuan D, Wu X. Enabling direct H2O2 electrosynthesis of 100 % selectivity at 100 mA cm-2 using a continuous flow sulfite/air fuel cell. *Chem. Eng. J.* **455**, 11 (2023).

34. Chen H*, et al.* Surface Redox Chemistry Regulates the Reaction Microenvironment for Efficient Hydrogen Peroxide Generation. *J. Am. Chem. Soc.* **146**, 15356-15365 (2024).

35. Liu Z*, et al.* Stable H2O2 electrosynthesis at industrially-relevant currents by a membrane-based electrode with high oxygen accessibility. *Applied Catalysis B: Environment and Energy* **357**, 124311 (2024).

36. Bashir SM, Gyenge EL. Efficient oxygen reduction to alkaline peroxide at current densities up to 500 mA cm-2 on a gas diffusion electrode with hydrophobic carbon microporous layer: Influence of fluid dynamics and reactor operation on scale-up. *Chem. Eng. J.* **494**, (2024).

37. Mohseni M, Dilokekunakul W, Wessling M, Keller RG. Advancing hydrogen peroxide electro-generation: Selective production at high rates in a flow-through module. *Electrochim. Acta* **497**, 9 (2024).

38. Xu A*, et al.* Trans-electrode pressure of gas-diffusion electrodes significantly influencing the electrochemical hydrogen peroxide production. *Chemosphere* **361**, 142464 (2024).

39. Ruggiero BN, Lu XK, Adonteng K, Dong J, Notestein JM, Seitz LC. Local reaction microenvironment impacts on H2O2 electrosynthesis in a dual membrane electrode assembly solid electrolyte electrolyzer. *Chem. Eng. J.* **486**, 150246 (2024).

40. Tian Q*, et al.* Nanoengineering of Porous 2D Structures with Tunable Fluid Transport Behavior for Exceptional H2O2 Electrosynthesis. *Nano Lett.* **24**, 1650-1659 (2024).

41. Ni CC, Fan ZH, Deng N, Huang X. Inhibiting Joule Heating to Enhance the Hydrogen Peroxide Electrosynthesis Efficiency at Industrial Level Current Density. *ACS Appl. Energ. Mater.* **7**, 3116-3124 (2024).

42. Ri K*, et al.* High effective generation of hydrogen peroxide by adjusting three-phase interfaces of gas diffusion electrode during the oxygen reduction reaction. *Sep. Purif. Technol.* **336**, 12 (2024).
